1 **Chronic nicotine increases midbrain dopamine neuron activity and biases individual**  
2 **strategies towards reduced exploration in a foraging task.**

3

4 Authors:

5 Malou Dongelmans<sup>1#</sup>, Romain Durand-de Cuttoli<sup>1,3#</sup>, Claire Nguyen<sup>1#</sup>, Maxime Come<sup>1,2#</sup>, Etienne K. Duranté<sup>1</sup>,  
6 Damien Lemoine<sup>1</sup>, Raphael Britto<sup>1</sup>, Tarek Ahmed Yahia<sup>1</sup>, Sarah Mondoloni<sup>1</sup>, Steve Didiene<sup>1,2</sup>, Elise Bousseynol<sup>1,2</sup>,  
7 Bernadette Hanneke<sup>1</sup>, Lauren M. Reynolds<sup>1,2</sup>, Nicolas Torquet<sup>1</sup>, Deniz Dalkara<sup>4</sup>, Fabio Marti<sup>1,2</sup>, Alexandre  
8 Mourot<sup>1,2</sup>, Jérémie Naudé<sup>1,2</sup>, Philippe Faure<sup>1,2\*</sup>

9

10 Affiliations

11 <sup>1</sup> Sorbonne Université, INSERM, CNRS, Neuroscience Paris Seine - Institut de Biologie Paris Seine (NPS - IBPS),  
12 75005 Paris, France.

13 <sup>2</sup> Brain Plasticity Unit, CNRS, ESPCI Paris, PSL Research University, 75005 Paris, France

14 <sup>3</sup> Nash Family Department of Neuroscience, Icahn School of Medicine at Mount Sinai, New York, NY, USA

15 <sup>4</sup> Sorbonne Université, INSERM, CNRS, Institut de la Vision, Paris, France.

16

17 #equal contribution

18 \* Correspondence to [phfaure@gmail.com](mailto:phfaure@gmail.com)

19 **Summary**

20 Long-term exposure to nicotine alters brain circuits and induces profound changes in decision-making strategies,  
21 affecting behaviors both related and unrelated to drug seeking and consumption. Using an intracranial self-  
22 stimulation reward-based foraging task, we investigated the impact of chronic nicotine on the trade-off between  
23 exploitation and exploration, and the role of ventral tegmental area (VTA) dopamine (DA) neuron activity in decision-  
24 making unrelated to nicotine-seeking. Model-based and archetypal analysis revealed a substantial inter-individual  
25 variability in decision-making strategies, with mice passively exposed to chronic nicotine visiting more frequently  
26 options associated with higher reward probability and therefore shifting toward a more exploitative profile compared  
27 to non-exposed animals. We then mimicked the effect of chronic nicotine on the tonic activity of VTA DA neurons  
28 using optogenetics, and found that photo-stimulated mice had a behavioral phenotype very close to that of mice  
29 exposed to nicotine, suggesting that the dopaminergic control of the exploration/exploitation balance is altered  
30 under nicotine exposure. Our results thus reveal a key role of tonic midbrain DA in the exploration/exploitation  
31 trade-off and highlight a potential mechanism by which nicotine affects decision-making.

## 32 Introduction

33 Nicotine is the primary reinforcing component driving tobacco addiction <sup>1,2,3</sup>. Like most addictive substances,  
34 nicotine is hypothesized to perpetuate addiction through alterations in dopamine (DA) signaling and plasticity in the  
35 mesocorticolimbic pathway <sup>4</sup>. Repeated activation of ventral tegmental area (VTA) DA neurons by nicotine not only  
36 leads to reinforcement but also to craving and lack of self-control over intake <sup>5</sup>. Concurrently, chronic exposure to  
37 nicotine also causes modifications of decision-making processes, which affect personality traits and behaviors that  
38 extend beyond drug-seeking or -consumption <sup>6,7</sup>, such as impulsivity <sup>8,9</sup> and exploratory behaviors <sup>10,11</sup>. These traits  
39 in turn actively contribute to the persistence of drug consumption, by promoting relapse and susceptibility to other  
40 addictions <sup>12</sup>. However, the impact of nicotine-induced modifications of DA neural networks on choice behaviors,  
41 and particularly the tradeoff between exploration and exploitation, is still undetermined.

42 When faced with a choice between two alternatives with low and high probabilities of reward, animals choose the  
43 less likely rewarded option a significant portion of the time. The origin of such seemingly suboptimal choice strategy  
44 remains poorly understood. It has been interpreted in different studies as noise, error, risk seeking, irrational belief  
45 or exploration <sup>7,13-16</sup>. In the context of exploration, choosing an option with less likelihood of immediate reward is an  
46 essential adaptive process related to cognitive flexibility and to gathering information about unknown or uncertain  
47 outcomes in a changing environment. Exploration is thus central to the emergence and organization of behaviors  
48 <sup>17</sup>, naturally resulting in the acquisition of new information crucial for learning and optimizing behavioral strategies  
49 <sup>7,13</sup>. Determining whether chronic nicotine exposure alters such exploratory behaviors is thus fundamental to help  
50 understand modifications of individual traits associated with continued nicotine consumption.

51 Altered DA function is a promising candidate to link chronic nicotine exposure to changes in decision making  
52 behavior. This neuromodulator, which is at the crossroads of motivation, learning and decision-making, can be  
53 hijacked, in the context of addiction, by most drugs of abuse <sup>18-20</sup>. Changes in the spontaneous tonic firing of VTA  
54 DA neurons, as a consequence of repetitive drug-use, can indeed alter the subjective value assigned to available  
55 rewards <sup>19</sup>, as well as the motivational salience of the drug or of drug-predicting cues <sup>21</sup>, influencing decisions about  
56 which reward to pursue <sup>22</sup>. Tonic DA can scale the performance of a learned behavior <sup>23</sup>, the incentive value  
57 associated with environmental stimuli <sup>24</sup>, or signal the average reward <sup>25</sup>. In the exploration/exploitation framework,  
58 the role of tonic DA remains debated. The effect of DA manipulation on the exploration/exploitation balance is  
59 convincing but varies depending on the task <sup>26-28</sup>. Increasing tonic striatal DA release has been suggested to either  
60 increase <sup>28</sup> or decrease <sup>27</sup> the level of exploration. Decreasing tonic striatal DA has also been suggested to increase  
61 exploration <sup>29</sup>. Hence, drug-induced alterations of DA transmission may modify behavioral choices, either positively  
62 or negatively depending on the environment and the specific type of DA manipulation.

63 Using an intracranial self-stimulation (ICSS) reward-based foraging task for mice, we have shown that decisions in  
64 this foraging task are modulated by the cholinergic neurotransmission of the VTA, with a particular role of nicotinic  
65 acetylcholine receptors (nAChR) in expected uncertainty driven exploration <sup>30</sup>. Here we demonstrated that chronic  
66 nicotine exposure increases the tonic activity of VTA DA neurons and reduces exploration, with mice focusing on  
67 the most valuable options at the expense of information gathering. Increasing the tonic activity of VTA DA neurons

68 using optogenetics was sufficient to mimic the behavioral bias (or exploratory decrease) induced by nicotine,  
69 indicating that the DA control of the exploration/exploitation balance is altered by long-term nicotine exposure.

70

## 71 **Results**

### 72 **Mice biased their choices in a multi-armed ICSS bandit task by motor cost, probability and uncertainty of** 73 **the reward delivery.**

74 To assess choice behavior in an uncertain environment, we used a multi-armed ICSS bandit task for mice where  
75 specific locations, hereafter called targets, were associated with brain stimulation rewards delivered to the medial  
76 forebrain bundle (MFB) (Figure 1A, Supplementary Figure 1)<sup>16,30,31</sup>. The task takes place in a circular open-field  
77 (interior diameter = 80 cm), with three explicitly marked targets forming the apices of a triangle (Figure 1B). Passing  
78 over each target results in the delivery of a rewarding intra-cranial electrical stimulation. Mice could not receive two  
79 consecutive stimulations from the same target, and thus learn to forage from one to another to continue receiving  
80 stimulations (Figure 1B Left). During the training period (5-min daily sessions), hereafter called the deterministic  
81 setting (DS, Figure 1C Left), every visit to a target was reinforced by a stimulation reward (reward probability  $p =$   
82  $100\%$  at each location,  $p_{100}$ ). At the end of the DS, mice were confronted with a probabilistic setting (PS, Figure 1C  
83 Right) where each target was now associated with a different probability of stimulation delivery ( $p = 100\%$ ,  $50\%$   
84 and  $25\%$ , Figure 1C Right). As previously shown<sup>30</sup>, both the expected reward probabilities and uncertainties  
85 associated with the different targets in the PS induced a marked change in the behavioral pattern compared to the  
86 DS. Trajectories at the end of the DS were stereotyped, almost circular, with a low probability of directional changes  
87 (i.e. returning to the previous target, Figure 1D) due to an associated motor cost<sup>16</sup>. In contrast, in the PS mice  
88 distributed their choices differently and increased their probability of directional changes, indicating an adaptation  
89 from the circular strategy (Figure 1D). Directional changes in the PS were not random: rather, they allowed animals  
90 to focus on specific targets. Indeed, compared to the DS where mice visited the three targets with a uniform  
91 distribution, in the PS mice visited more often the targets associated with the highest reward probabilities (i.e.  $p_{100}$   
92 and  $p_{50}$ , Figure 1E). This indicates a matching behavior, i.e., a quantitative relationship between the rate of target  
93 visits and the probability to receive a reward on each target. Since mice could not receive two consecutive rewards  
94 from the same target, this repartition on the rewarding locations resulted from a sequence of binary choices (Figure  
95 1F) in three gambles ( $G_{100}$ ,  $G_{25}$ ,  $G_{50}$ ) between two respective payoffs (here,  $G_{100} = \{p_{50}$  versus  $p_{25}\}$ ,  $G_{25} = \{p_{100}$   
96 versus  $p_{50}\}$ ,  $G_{50} = \{p_{100}$  versus  $p_{25}\}$ ). Hence, we analyzed the sequence of choice statistics using a transition function,  
97 allowing us to investigate each gamble independently. For  $G_{100}$  and  $G_{50}$ , mice chose the optimal location (i.e., the  
98 one associated with the highest probability of reward) more than  $50\%$  of the time. However, as previously observed,  
99 for  $G_{25}$  the probability to choose  $p_{100}$  over  $p_{50}$  was not different from a random choice (Figure 1F), which has been  
100 interpreted as indicating that mice assign a positive motivational value to expected uncertainty, which is maximal  
101 at  $p_{50}$ <sup>30</sup>. Overall mice biased their choices depending on both the probability and the uncertainty of reward delivery.  
102 Behavior in the task was therefore the result of a combination between rewards, uncertainty and motor cost.

103

104 **Chronic nicotine exposure decreased exploration and increased exploitation of the most valuable options.**

105 We aimed to investigate the effects of chronic nicotine exposure on decision-making behavior and on the balance  
106 between exploration and exploitation. To do so, we implanted osmotic minipumps subcutaneously to expose mice  
107 to continuous nicotine (Nic, 10mg/kg/day) or saline (Sal) for 3 weeks and then compared their behavior in the PS  
108 of the ICSS task (Figure 2A). Because nicotine induces long lasting adaptations in the midbrain DA system<sup>32</sup>, and  
109 because VTA DA neurons have been associated with decision-making under uncertainty<sup>18,30</sup>, we first analyzed the  
110 spontaneous tonic activity of VTA DA cells in anesthetized mice. We recorded from mice chronically exposed to  
111 either saline or nicotine via minipump, and that had performed the behavioral task (“ICSS”, at the end of PS), or  
112 were behaviorally naïve. DA neuron firing was analyzed with respect to the average firing frequency and the  
113 percentage of spikes within bursts. As previously reported<sup>33,34</sup>, chronic exposure to nicotine increased the tonic  
114 activity of DA neurons, both in terms of firing frequency and bursting activity, when compared to mice implanted  
115 with a saline minipump (Figure 2B). Furthermore, mice exposed to the ICSS task exhibited an increase in firing  
116 frequency, but no change in bursting activity when compared to mice that were not stimulated (Figure 2B).

117 We then analyzed the behavior of mice in the ICSS task. Overall, we did not see any behavioral difference between  
118 mice implanted with a saline minipump (n=23) and the non-implanted mice (n=32) analyzed in Figure 1  
119 (Supplementary Figure 2). Therefore, these two groups were pooled and henceforth referred to as control (Ctl,  
120 n=55). Trajectories at the end of the DS were stereotyped, almost circular, in both Ctl and Nic mice. Both groups  
121 distributed their visits equally over the three locations (Figure 2C) and their respective probabilities of directional  
122 changes were equal ( $\Delta = -2.7\%$ , Figure 2D). However, the total number of rewards was higher for Nic mice than  
123 for Ctl mice ( $\Delta = 26$ , Figure 2E), as a consequence of the decrease in the mean time-to-goal (i.e., the time necessary  
124 to go from one target to the next) in Nic mice ( $\Delta = 0.83$  s, Figure 2F). When mice were placed in a classical open  
125 field (without ICSS), a greater velocity was observed in mice exposed to nicotine, yet only at the beginning of the  
126 session (Supplementary Figure 3). This result suggests that the increased speed observed in the ICSS task for  
127 nicotine-treated mice may arise from the combined effects of nicotine exposure and the stimulation rewards.

128 Clear differences in the behavior of nicotine- and saline-exposed mice were observed in the PS. Both groups  
129 distributed their choices depending on the probability to receive a reward, but with different strategies. Notably,  
130 while Ctl mice visited significantly  $p_{25}$ , Nic mice focused on the two most rewarded options (i.e.,  $p_{50}$  and  $p_{100}$ , Figure  
131 2G,  $\Delta_{25} = -5\%$ ,  $\Delta_{50} = 2.7\%$ ,  $\Delta_{100} = 2.3\%$ ). These modifications were associated with an increase in the percentage  
132 of directional changes ( $\Delta = 11\%$ , Figure 2H) and in the optimal choice in gamble  $G_{100}$  (Figure 2I,  $\Delta = 10\%$ ) for Nic  
133 mice compared to Ctl mice. We also observed an increase in the total number of obtained rewards ( $\Delta = 17.9$ ,  $p =$   
134  $0.002$ ) and in the percentage of success (number of rewards divided by the number of trials,  $\Delta = 2\%$ ,  $p = 0.02$ ) in  
135 Nic mice compared to Ctl mice. Finally, the comparison of mean time-to-goal between the two groups ( $\Delta = -1.1$   
136 sec, Figure 2J) indicates again an increased velocity in Nic mice, as was already observed in the DS. This increase  
137 in speed in the PS is not associated with a decrease in the number of directional changes made by Nic mice,  
138 suggesting that animals did not enter an automatic circular mode, disengaged from actual choices, but instead  
139 remained in a deliberative process. Altogether, these results indicate chronic nicotine modifies the decision strategy  
140 of mice by biasing choices toward the most immediately valuable options, and thus reduces exploration.

141 In the PS, adopting a purely exploitative strategy to maximize the success rate would require solely the alternation  
142 of visits between  $p_{100}$  and  $p_{50}$ . Both Ctl and Nic groups clearly deviated from this strategy of pure exploitation,  
143 although Nic mice were more exploitative on average. Yet population analyses (i.e. averaging over groups of  
144 animals) classically do not reflect the wide range of distinct behaviors and strategies that can be adopted by  
145 individuals. We therefore further analyzed our behavioral data, with the aim of revealing individual profiles and their  
146 adaptation under nicotine exposure.

147

148 **Archetype analysis suggests that mice exhibit inter-individual variability in choice strategies, with chronic**  
149 **nicotine fostering exploitative profiles.**

150 Visual inspection of individual trajectories revealed that in the PS, some mice retained a circular strategy (with  
151 either an ascending ( $p_{25} - p_{50} - p_{100}$ ) or descending ( $p_{100} - p_{50} - p_{25}$ ) order) while others had what we hereafter call a  
152 gain-optimizing (GO) strategy, alternating between targets associated with the highest reward probabilities ( $p_{100}$   
153 and  $p_{50}$  - Figure 3A, lower left). By a gain-optimizing strategy, we mean a very basic definition of optimality based  
154 only on maximizing the number of rewards, but which does not take into account the advantage of exploration.  
155 Theoretically, always choosing the most valuable option would lead to an average success rate of 75% (Figure 3A,  
156 lower right) while a purely circular strategy would lead to an average estimate of 58.3% success rate (Figure 3A,  
157 upper right). Accordingly, the percentage of directional changes was correlated with the success rate (Figure 3B,  
158 for Ctl and Nic mice). Progressively adding directional changes between the  $p_{50}$  and  $p_{100}$  targets to the circular  
159 pattern theoretically result, in this plot, in a displacement along the line that connects the theoretical points of the  
160 circular strategy (0% U-turn, 58.3% success) to the gain-optimizing strategy (100% directional changes, 75%  
161 success) (Figure 3B, red line). We found experimentally that the slope ( $s = 17.1 \pm 1.5$ , black line, Figure 3B) of the  
162 correlation between directional change and Success rate was almost parallel to the theoretical line from circular to  
163 gain-optimizing strategies ( $S_{th} = 16.7$ , red line, Figure 3B), indicating that most of the directional changes were not  
164 random, but consisted in back-and-forth sequences between the  $p_{50}$  and  $p_{100}$  targets.

165 To test whether the variabilities in behavior were robust for each individual from trial to trial, we compared the  
166 percentage of directional changes for two consecutive sessions for each animal of the Ctl group. Directional  
167 changes showed a strong positive correlation from one session to the next (Figure 3C), suggesting a strong  
168 consistency in individual behaviors and inter-individual variations in the strategy used during the PS. We thus  
169 characterized individual behaviors of all mice (both Ctl and Nic groups, i.e.  $n=82$ ) in the task using a seven-  
170 dimensional dataset based on the statistics of i) the directional changes, ii) the target distributions and iii) the three  
171 gambles (see data Figure 1 D-F). Principal-component analysis methods have been classically used to split high-  
172 dimensional data sets into clusters. Rather than aggregating individual data onto typical observations (the cluster  
173 centers), archetypal analysis<sup>35,36</sup> depicts individual behavior as a continuum within an “archetypal landscape”  
174 defined by extreme strategies, the archetypes. Individual data points are represented as linear combinations of  
175 extrema (vertex corresponding to “archetypal strategies”) of the dataset. The seven-dimensional dataset was used  
176 to identify three archetypal phenotypes. The three archetypes and their characteristics (Figure 3D) differentiated  
177 mice exhibiting a gain-optimizing strategy (i.e. focusing on  $p_{50}$  and  $p_{100}$ ), Figure 3A, below) which are referred to as

178 gain-optimizers (GO, in grey), from mice with circular patterns (equal distribution between the three targets, Figure  
179 3A above), which either turned in a descending manner (labelled Des, in blue, sequence  $p_{100} - p_{50} - p_{25}$  associated  
180 with high  $G_{100}$  and  $G_{25}$  but low  $G_{50}$ ) or an ascending manner (labeled Asc, sequence  $p_{25} - p_{50} - p_{100}$  associated with  
181 low  $G_{100}$  and  $G_{25}$  but high  $G_{50}$ ). The individual behavior of each of the 82 mice could be defined as a weighted  
182 combination of these three extremes in a ternary plot (Figure 3E). An animal's behavior in this ternary plot is defined  
183 by three coordinates (a,b,c) that sum to 1 and that depict its relative archetypal composition. Therefore, these  
184 coefficients (a,b,c) could be used to assign an individual to its nearest archetype based on its behavioral profile  
185 (Figure 3E left). This assignment revealed that 23.2 % of the mice were closer to the GO archetype (grey), while  
186 the remaining mice were evenly distributed between the Des (39%, blue) and Asc archetypes (37.8%, green)  
187 (Figure 3E Right). To analyze the effect of chronic nicotine, we split Ctl and Nic mice, and showed that these two  
188 groups distributed differently in the archetypal space as indicated by a modification of i) the distribution of the  
189 archetype's assignments (Figure 3F) and of ii) the archetypal composition (Figure 3G). Overall, chronic nicotine  
190 exposure produced an apparent displacement of the population further from Asc and Des apices and closer to the  
191 GO apex, thus it favored the emergence of the more exploitative, and thus less explorative, GO phenotype.

192

### 193 **Nicotine exposure modified decision parameters associated with exploration and cost.**

194 To quantitatively describe the effects of nicotine on the decision processes underlying choice behavior in mice, we  
195 modeled our data using a softmax model of decision-making. In this model, the probability of choosing a target A  
196 over B depends on the difference between their expected values, here the probability  $p$  of reward delivery  
197 associated with each target (as the stimulation magnitudes were the same for all targets), and the "inverse  
198 temperature" parameter  $\beta$  which represents the sensitivity to the difference of values ( $\Delta V$ ). A small  $\beta$  favors  
199 exploration (the proportion of respective choices is less sensitive to  $\Delta V$ , with a null  $\beta$  meaning all options have  
200 nearly the same probability to be selected, independently of their respective value), while a large  $\beta$  indicates  
201 exploitation (high sensitivity to  $\Delta V$ , with an infinite  $\beta$  meaning that options associated with higher reward  
202 probabilities are always selected).  $\beta$  can thus be considered as a proxy to measure the exploration/exploitation  
203 tradeoff. This model was adapted to account for the behavior of mice in the PS as follows: first, decisions were  
204 biased towards actions with the most uncertain consequences, by assigning a bonus value  $\varphi$  to the expected  
205 uncertainties, i.e. the variance  $p(1-p)$  associated with each location<sup>30</sup>. This allowed us to explain the atypically low  
206 probability of choosing  $p_{100}$  over  $p_{50}$  in  $G_{25}$  (Figure 1F). Second, to account for the circular bias observed in both  
207 DS and PS, we added a motor cost which decreases the value of a target if it requires the animal to perform a  
208 directional change<sup>37</sup>. Thus, in this adapted softmax model (Figure 4A and Methods), the "exploration/exploitation"  
209 parameter  $\beta$  represents how the probability to choose between options depends on the difference of their respective  
210 subjective values, which was defined as the weighted sum of the expected values (100, 50 or 25 %), expected  
211 uncertainty (weighted by parameter  $\varphi$ ) and expected motor cost (weighted by parameter  $\kappa$ ) of a given target.

212 We fitted the transition function of each mouse from the Ctl group ( $n = 55$ ) with this model, resulting in positive  $\beta$ ,  
213  $\varphi$  and  $\kappa$  values (Figure 4B). The robustness of the model was then assessed by generating sequences of choices

214 (n = 2000 model choices) for n = 55 mice with their respective model parameters (Figure 4C). The model accurately  
215 reproduced the mean distribution of targets (Figure 4C, Left), the proportion of directional changes (Figure 4C,  
216 Middle) and the choice transition function (Figure 4C, Right). Individual transition functions from Nic mice (n=27)  
217 were then fitted by the same model. When compared with the model parameters of Ctl mice, nicotine exposure  
218 increased the value sensitivity parameter  $\beta$ , and decreased the cost of directional changes  $\kappa$  parameter, but did  
219 not affect the uncertainty bonus  $\varphi$  (Figure 4D).

220 We then assessed whether archetypal phenotypes of choice data could be derived from differences in decision-  
221 making processes measured by the parameters of our model by evaluating the value of the three parameters  
222 ( $\beta$ ,  $\varphi$ ,  $\kappa$ ) depending on the archetypal composition (see methods). Overall, the three archetypes corresponded to  
223 different combinations of the model parameters (Figure 4E). The GO (grey) archetype was associated with a high  
224 value of  $\beta$  (corresponding to exploitation) and  $\varphi$  but a low motor cost  $\kappa$ , which is consistent with individuals that  
225 favor the alternation between locations associated with higher probability ( $p_{100}$  and  $p_{50}$ ). The Des and Asc  
226 phenotypes corresponded to strong circular behaviors and thus to high motor cost  $\kappa$  and low sensitivity to  
227 value  $\beta$ . Des and Asc differed by their  $\varphi$  value ( $\Delta = 1.012$ ,  $p = 0.0079$ ), which was related with the directionality  
228 of their preferred rotation: a low preference to uncertainty  $\varphi$  corresponds to mice choosing the certain  $p_{100}$  reward  
229 over the uncertain  $p_{50}$  reward, resulting in a tendency for sequence  $p_{25} \rightarrow p_{100} \rightarrow p_{50}$  observed in Des mice (blue).  
230 Conversely, a high preference for uncertainty  $\varphi$  is associated with the reverse sequence  $p_{25} \rightarrow p_{50} \rightarrow p_{100}$  observed  
231 in Asc mice (green).  $\beta$  and  $\kappa$  appeared non-linearly correlated, as indicated by the negative relationship between  
232 archetypal composition and  $\beta$  and  $\kappa$  variations (Figure 4E) and by the inverse correlation between  $\beta$  and  $\kappa$  (Figure  
233 4F, pooled Ctl and Nic groups). Overall, the decomposition of the archetypal phenotypes into their underlying  
234 decision-making processes illustrate how distribution of individual decision-making strategies (Asc, Des and GO)  
235 in a population, could correspond to transitions in the parameter values from the same model. It also allows us to  
236 interpret the effects of nicotine as a coordinated increase of  $\beta$  and decrease of  $\kappa$  consistent with a deviation towards  
237 the GO profile. We thus asked whether recapitulating these effects on decision parameters  $\beta$  and  $\kappa$  would be  
238 sufficient to shift decision-making strategy towards the GO profile. To test this idea, we modeled the choices (N =  
239 2000) using decision-making parameters from the Ctl population (n=55, as in Figure 3B-C) modified by the average  
240 difference observed in the  $\beta$  and  $\kappa$  parameters from Nic mice. To avoid spurious effects associated with the  
241 resulting  $\beta$  and  $\kappa$  values falling outside the range observed for Nic + Ctl mice, we increased the  $\beta$  parameter and  
242 derived  $\kappa$  from their non-linear relationship (fitted in Figure 4F). We evaluated the consequences of mimicking the  
243 effect of nicotine on decision-making parameters by comparing the three main behavioral measures altered by  
244 nicotine: i) the probability to choose the most valuable option in gamble  $G_{100}$  (choosing  $p_{50}$  over  $p_{25}$ ), ii) the  
245 percentage of directional changes and iii) the probability to visit  $p_{25}$ . By applying a combination of  $\beta$  increase and  
246  $\kappa$  decrease (derived from Nic mice) to the Ctl model parameters, the model accurately reproduced, for the three  
247 measures (Figure 4G), the changes observed in decision-making strategy following chronic nicotine exposure.  
248 Conversely, by combining a decrease in  $\beta$  with an increase in  $\kappa$  (i.e. subtracting the average effect of nicotine from  
249 the Nic model parameters) we are able to simulate the conversion of a Nic behavioral profile into a Ctl profile.



250

251 **Optogenetic stimulation of VTA DA neurons recapitulated the effects of nicotine.**

252 Finally, to assess whether the changes we observed in decision-making strategies following chronic nicotine  
253 exposure could be linked to the alterations of VTA DA neuron activity, we sought to experimentally alter choice  
254 behaviors by acutely manipulating the activity of VTA DA neurons using optogenetics. Nicotine exposure is known  
255 to induce modifications in a number of brain areas<sup>38</sup>, including an increase in the tonic activity of VTA DA neurons,  
256 as we indeed found in this study (Figure 2B). Furthermore, the tonic activity of DA neurons has been proposed to  
257 play a role in the balance between exploration and exploitation<sup>26-28</sup>. We thus asked whether directly modifying the  
258 firing pattern of VTA DA neurons was sufficient to alter decision-making behavior and recapitulate the effects of  
259 chronic nicotine in our ICSS task. To specifically and bi-directionally manipulate VTA DA neurons, we expressed  
260 either an excitatory channelrhodopsin (CatCh,<sup>39</sup>) or an inhibitory halorhodopsin variant (Jaws,<sup>40</sup>) in DAT<sup>Cre</sup> mice  
261 using a Cre-dependent viral strategy (Supplementary Figure 5A). We confirmed in patch-clamp recordings that  
262 continuous 5ms-light pulses at 8 Hz (470 nm) reliably increased VTA DA neuron activity in CatCh-transduced mice  
263 (Figure 5A), while 500ms-light pulses at 0.5 Hz (520 nm) reliably decreased their activity in Jaws-transduced mice  
264 (Figure 5B).

265 After mice completed both the DS and PS in the ICSS task, they went through four stimulation sessions (Stim)  
266 maintaining the same rules as the PS, with an alternating schedule of two days with photo-stimulation (ON, photo-  
267 stimulation started 5 min prior to the start of task and was maintained throughout) and two without (OFF) (Figure  
268 5C). During the OFF days, mice were connected to the optical fiber patch-cord but did not receive light stimulation.  
269 For each pair of ON/OFF experiments, we estimated the effect of the photo-stimulation on the four main behavioral  
270 measures that were altered by chronic nicotine by calculating for a given measure (M) the difference  $M_{ON}-M_{OFF}$   
271 (Figure 5D, Supplementary Figure 5B-C). Overall, we found that optogenetic activation and inhibition of VTA DA  
272 neurons had opposite effects on behavioral outcomes such as the time to goal (Supplementary Figure 5B), the  
273 proportion of directional changes (Figure 5D, left), the proportion of visits on  $p_{25}$  (Figure 5D right), and the choice  
274 made in gamble  $G_{100}$  (Supplementary Figure 5C). Optogenetic activation increased directional changes (Figure 5D  
275 left) and decreased the probability to visit  $p_{25}$  (Figure 5D right), favoring alternations between  $p_{100}$  and  $p_{50}$ , similar  
276 to the effect of nicotine. Opposite effects were observed for these two parameters when the firing rate was reduced  
277 in VTA DA cells using Jaws (Figure 5D). However, such optogenetic inhibition did not significantly affect the time  
278 to goal (Supplementary Figure 5B) nor the choice in the gamble  $G_{100}$  (Supplementary Figure 5C).

279 We then fitted the transition function of Catch- and Jaws-transduced mice with our decision-making model. As we  
280 observed with chronic nicotine, the effects of photo-activating VTA DA neurons on decision-making within the ICSS  
281 task could be modeled as an increase of  $\beta$  and a decrease of  $\kappa$  (Figure 5E). Photo-inhibition of VTA DA neurons,  
282 however, produced an apparent increase in the motor cost  $\kappa$ , opposite to the effect of chronic nicotine, but with no  
283 significant effects on the exploration/exploitation tradeoff parameter  $\beta$  (Figure 5E). By analyzing decision-making  
284 behaviors between the stimulated (ON) and non-stimulated (OFF) conditions in the previously identified archetypal  
285 space, we revealed that VTA DA neuron activation draws individual phenotypes towards the GO archetype (i.e.,  
286 increased GO archetypal composition), while VTA DA neuron inhibition drew individuals away from GO (Figure 5F).

287 Thus, altering the firing pattern of VTA DA neurons, by changing both the motor cost and the balance between  
288 exploration and exploitation behavior, is sufficient to drive the bias of decision behaviors in the ICSS task, as  
289 suggested by our simulations (Figure 4). Furthermore, increasing VTA DA neuron firing mimicked the effects of  
290 chronic nicotine exposure on decision-making measures, linking the behavioral alterations with the physiological  
291 changes to DA neurons we observed in Nic mice.

292

## 293 **Discussion**

294 Understanding how nicotine affects decision-making has been challenging, because two different physiological  
295 aspects need to be distinguished <sup>31</sup>: (1) nicotine as a reinforcer that directly activates the dopaminergic system to  
296 produce reinforcement and nicotine-seeking, and (2) nicotine as a neuromodulator that alters nicotine-independent  
297 decision-making processes by modifying the dynamics and computational properties of cholinceptive circuits.  
298 Here, using a multi-armed ICSS bandit task, we show that mice passively treated with nicotine progressively learn  
299 to forage more frequently at locations with the highest probabilities of reward ( $p_{50}$  and  $p_{100}$ ) compared to naive  
300 animals, suggesting a bias in the exploration/exploitation tradeoff which decreases exploration. Acutely increasing  
301 the tonic activity of VTA DA neurons during the task recapitulated the effects of chronic nicotine exposure on mouse  
302 decision-making.

303

304 In our experiment, mice adapted their choices according to the probability of reward delivery, but they also  
305 consistently continued to visit the targets associated with lower reward probabilities in all of the gambles, even after  
306 extended training. Such a high level of exploratory behavior is potentially attributable to the setup, which is  
307 characterized by the delivery of small rewards, serially repeated gambles with short delays between trials, and  
308 learning through experience <sup>41</sup>. The fact that mice continue to visit targets with the lowest probability in each of the  
309 gambles, despite intensive learning, can reflect i) exploratory noise, generally modeled via decreased value  
310 sensitivity (or increased randomness) of  $\beta$  in the softmax model, ii) directed exploration, if one considers that mice  
311 continue to explore locations associated with low reward probability to reduce the uncertainty associated with  
312 probabilistic omission, and iii) uncertainty-seeking, which is neither explorative nor exploitive but considers that  
313 mice simply attribute a positive value to expected uncertainty. Mouse choices and qualitative inter-individual  
314 variations were well described by a simple computational model of decision-making that takes into account  
315 exploration/exploitation tradeoff, uncertainty, and motor cost. Idiosyncrasy in choice behavior was well reflected by  
316 continuous variations in the key parameters of this model. Despite variations in individual choice behaviors, the  
317 consequences of nicotine administration were consistent, with a clear effect on the  $\beta$  and  $\kappa$  parameters, and a  
318 strategy biased towards the exploitation of the highest reward values.

319

320 The increase of  $\beta$  reflects an amplified exploitative behavior, an effect that has been previously linked to enhanced  
321 tonic DA activity, which is hypothesized to modulate the bias towards optimal choices <sup>26-28</sup>. In this study, we  
322 demonstrate a direct link between DA neuron tonic activity and exploitation using electrophysiological and  
323 optogenetic approaches. The multi-armed ICSS bandit task enables, through a clear distinction between action

324 selection (choices) and action execution (time to goal), to identify the modified components of value-based decision-  
325 making in relation to tonic DA. We explicitly demonstrate an increase in value sensitivity due to nicotine-induced  
326 alterations in tonic DA activity. Previous ICSS studies have observed that chronic exposure to drugs sensitizes the  
327 brain reward system, and in doing so lowers the stimulation threshold (expressed as a current intensity or  
328 stimulation frequency)<sup>42</sup> required for ICSS<sup>43</sup>. Here we expand these results by quantifying the effects of such  
329 increased value sensitivity on choices between ICSS-mediated rewarding locations, and further identifying a causal  
330 link between these behavioral modifications and increased tonic activity of VTA DA neurons. Long-term nicotine  
331 exposure increases the basal activity of VTA DA neurons<sup>33,34</sup> through desensitization and up-regulation of nAChRs  
332 and the long-term strengthening of glutamatergic synaptic transmission<sup>44</sup>. Here we show that elevating VTA DA  
333 neuron activity in an acute fashion using optogenetics is sufficient to induce behavioral alterations in mice similar  
334 to those that we observed following chronic nicotine exposure.

335  
336 Variations in neuromodulatory functions, including those in the catecholamine and cholinergic systems, contribute  
337 to the process of individuation<sup>45-47</sup>. DA, and in particular from VTA DA neurons, has been linked to a cluster of  
338 traits (extraversion, novelty-seeking, etc.) conceptually related to reward-seeking<sup>48 49</sup>. However, despite the  
339 substantial attention paid to DA in personality neuroscience, and despite a clear association between modulations  
340 in dopaminergic function and variations in individual traits, defining which specific traits are influenced by DA  
341 remains a challenging task. Our data suggest that modification in basal VTA DA neuron activity can directly modify  
342 the expression of one central personality trait: exploration. This result is reminiscent of the observations made from  
343 mice living continuously in a large environment, which display idiosyncratic behavioral strategies during a decision-  
344 making task, and for which the exploration/exploitation balance was correlated with the activity of their DA system  
345<sup>47</sup>.

346  
347 Nicotine exposure alters decision-making processes<sup>6</sup>. Non-contingency studies have previously shown that yoked  
348 nicotine exposure increases the incentive salience of non-nicotine stimuli<sup>50</sup>, similar to the sensitization to ICSS  
349 rewards<sup>43</sup>. These studies suggest an essential role of contextual cues in smoking and the nicotine-induced increase  
350 in reward sensitivity. Neuroeconomics studies have also linked smoking with increased impulsivity (delay  
351 discounting task<sup>8</sup>), lack of counterfactual learning signals<sup>51</sup>, and decreased behavioral flexibility (exploration in a  
352 dynamic bandit task<sup>10</sup>). Our results further reveal that nicotine exposure decreases exploration. In addition, we  
353 provide a mechanistic understanding of how reward processing may be altered at the level of the VTA in smokers.  
354 Our data underscore altered choice behaviors in smokers that likely participate in, but are not limited to, addiction  
355<sup>6</sup>. Nicotine-induced alterations in decision-making processes likely also have implications for everyday life,  
356 particularly as they can increase vulnerability for addiction to other drugs of abuse and for behavioral disorders  
357 such as pathological gambling that rely on value-based decisions<sup>7,52</sup> and present a high comorbidity with tobacco  
358 addiction<sup>53</sup>.

359 Acknowledgements:

360 We are grateful to the animal facilities (IBPS), Camille Robert and Paris Vision Institute AAV production facility for  
361 viral production and purification. This work was supported by the Centre National de la Recherche Scientifique  
362 CNRS UMR 8246, INSERM U1130, the Foundation for Medical Research (FRM, Equipe FRM DEQ2013326488 to  
363 P.F), FRM FDT201904008060 (to SM), the French National Cancer Institute Grant TABAC-16-022 et TABAC-19-  
364 020 (to P.F.), French state funds managed by the ANR (ANR-16 Nicostress to PF, ANR-19 Vampire to FM) and  
365 The LabEx Bio-Psy (to P.F). MLD, RDC and SM were the recipients of a fourth-year PhD fellowship from FRM  
366 (FDT20160435171, FDT20170437427 and FDT201904008060), CN was recipient of a doctoral fellowship from the  
367 Labex Bio-Psy, DL was recipient of a post-doctoral Fellowship from the Labex Bio-Psy, and LMR was supported  
368 by a NIDA–Inserm Postdoctoral Drug Abuse Research Fellowship."

369

370 Author contributions:

371 PF and MD designed the study. MD, RDC, CN, MC, TAY, EKD, RB, EB, BH, and NT performed the behavioral  
372 experiments. MD, RDC, SM and NT performed the minipumps implantations. JN, DL and SD contributed to setup  
373 developments. CN, SM, RDC, DL and FM performed electrophysiological recordings. MD, RDC, CN, MC, EKD,  
374 RB, TAY, EB, NT and JN performed the surgeries and virus injections. CN, SM, performed the  
375 immunohistochemistry experiments. DD provided the viruses. JN and PF developed the model. AM developed the  
376 optogenetic setup. MD, RDC, CN, MC, SM, JN, FM and PF analyzed the data. PF wrote the manuscript with inputs  
377 from MD, RDC, CN, MC, LMR, JN, FM and AM.

378

379 Declaration of interests: The authors declare no competing financial interests.

380 **Methods**

381

382 **Animals**

383 Experiments were performed on adult C57Bl/6J DAT<sup>ICRE</sup> and Wild-Type (Janvier Labs, France) mice. Male mice,  
384 from 8 to 16 weeks old, weighing 25-35 grams, were used for all the experiments. They were kept in an animal  
385 facility where temperature ( $20 \pm 2^\circ\text{C}$ ) and humidity were automatically monitored and a circadian light cycle of  
386 12/12-h light-dark cycle was maintained. All experiments were performed in accordance with the recommendations  
387 for animal experiments issued by the European Commission directives 219/1990, 220/1990 and 2010/63, and  
388 approved by Sorbonne University.

389

390 **AAV production**

391 AAV vectors were produced as previously described using the cotransfection method and purified by iodixanol  
392 gradient ultracentrifugation<sup>51</sup>. AAV vector stocks were tittered by quantitative PCR (qPCR)<sup>52</sup> using SYBR Green  
393 (Thermo Fischer Scientific).

394

395 **Intracranial self-stimulation electrode implantation**

396 Mice were anaesthetized with a gas mixture of oxygen (1 L/min) and 1-3 % of isoflurane (Piramal Healthcare, UK),  
397 then placed into a stereotaxic frame (Kopf Instruments, CA, USA). After the administration of a local anesthetic  
398 (Lurocain, 0.1 mL at 0.67 mg/kg), a median incision revealed the skull which was drilled at the level of the Median  
399 Forebrain Bundle (MFB). A bipolar stimulating electrode for ICSS was then implanted unilaterally (randomized) in  
400 the brain (stereotaxic coordinates from bregma according to mouse after Paxinos atlas: AP -1.4 mm, ML  $\pm$ 1.2 mm,  
401 DV -4.8 mm from the brain). Dental cement (SuperBond, Sun Medical) was used to fix the implant to the skull. After  
402 stitching and administration of a dermal antiseptic, mice were then placed back in their home-cage and had, at  
403 least, 5 days to recover from surgery. An analgesic, buprenorphine solution at 0,015 mg/L (0,1 mL / 10 g), was  
404 delivered after the surgery and if necessary, the following recovering days. The efficacy of electrical stimulation  
405 was verified through the rate of acquisition during the deterministic setting (see behavioral methods).

406

407 **Implantation of osmotic mini pumps**

408 After 5 days of training in the deterministic setting (see behavioral methods), animals were anesthetized with a gas  
409 mixture of oxygen (1L/min) and 1-3 % of isoflurane (IsoVet, Piramal Healthcare, UK). After the administration of a  
410 local anesthetic, an incision was performed at the level of the interscapular zone, to subcutaneously implant an  
411 osmotic minipump (Model 2004, ALZET, CA, USA) containing 200  $\mu\text{L}$  of either a solution of nicotine hydrogen  
412 tartrate salt (Sigma-Aldrich, USA) at a dose of 10 mg/kg/d or saline solution ( $\text{H}_2\text{O}$  with 0.9 % NaCl) for the control  
413 group. Both solutions were prepared in the laboratory. Minipumps delivered their content with a flow rate of 0.25  
414  $\mu\text{L}/\text{hour}$  over 28 days. The surgical wound was closed with surgical stitches. Animals had two days of rest to recover  
415 from the minipump surgery before going further with their behavioral training.

416

## 417 **Virus injections and optogenetics experiments**

418 DAT<sup>CRE</sup> mice were anaesthetized (Isoflurane 1-3%) and implanted with an ICSS electrode as described above.  
419 They were then injected unilaterally (randomized left/right side and ipsi/contralateral side regarding the ICSS  
420 electrode) in the VTA (1  $\mu$ L, coordinates from bregma: AP -3.1 mm; ML  $\pm$ 0.5 mm; DV -4.55 mm from the skull) with  
421 an adeno-associated virus (AAV5.EF1 $\alpha$ .DIO.hCatCh.YFP 2.46e<sup>12</sup> - 6.53e<sup>13</sup> ng/ $\mu$ L, AAV5.EF1 $\alpha$ .DIO.Jaws.eGFP  
422 1.16e<sup>13</sup> ng/ $\mu$ L or AAV5.EF1 $\alpha$ .DIO.YFP 6.89e<sup>13</sup> or 9.10e<sup>13</sup> ng/ $\mu$ L). A double-floxed inverse open reading frame (DIO)  
423 allowed to restrain the expression of CatCh (Ca<sup>2+</sup>-translocating channelrhodopsin) or Jaws (red-shifted  
424 cruxhalorhodopsin) to VTA dopaminergic neurons.

425 For optogenetic experiments on freely moving mice, an optical fiber (200  $\mu$ m core, NA = 0.39, Thor Labs) coupled  
426 to a ferrule (1.25 mm) was implanted just above the VTA ipsilateral to the viral injection (coordinates from bregma:  
427 AP -3.1 mm, ML  $\pm$ 0.5 mm, DV 4.4 mm), and fixed to the skull with dental cement (SuperBond, Sun Medical). The  
428 behavioral task began at least 4 weeks after virus injection to allow the transgene to be expressed in the target  
429 dopamine cells. An ultra-high-power LED (470 nm or 520 nm, Prizmatix) coupled to a patch cord (500  $\mu$ m core, NA  
430 = 0.5, Prizmatix) was used for optical stimulation (output intensity of 10 mW). Optical stimulation was delivered  
431 continuously, starting 5 min before and continuing throughout the 5 min of ON sessions of the task. Excitatory opsin  
432 (CatCh) was stimulated using 470 nm light pulses of 5ms duration and 8 Hz frequency. Inhibitory opsin (Jaws) was  
433 stimulated using 520 nm light pulses of 500 ms duration and 0.5 Hz frequency. The experiment followed a schedule  
434 of paired ON and OFF days after the end of training phase (DS + PS). The optical stimulation patch cord was  
435 plugged onto the ferrule during all experimental sessions (ON and OFF days) to habituate animals and control for  
436 latent experimental effects.

437

## 438 ***Ex vivo* patch-clamp recordings of VTA DA neurons**

439 To verify the functional expression of the excitatory opsin CatCh and the inhibitory opsin Jaws, 10-12 week-old  
440 male DAT<sup>CRE</sup> mice were injected with the viruses described above. After 4 weeks, mice were deeply anesthetized  
441 with an intraperitoneal (IP) injection of a mix of ketamine/xylazine. Coronal midbrain sections (250  $\mu$ m) were sliced  
442 using a Compressstome (VF-200; Precisionary Instruments) after intracardial perfusion of cold (4°C) sucrose-based  
443 artificial cerebrospinal fluid (SB-aCSF) containing (in mM): 125 NaCl, 2.5 KCl, 1.25 NaH<sub>2</sub>PO<sub>4</sub>, 5.9 MgCl<sub>2</sub>, 26  
444 NaHCO<sub>3</sub>, 25 Sucrose, 2.5 Glucose, 1 Kynurenate (pH 7.2, 325 mOsm). After 10-60 min at 35°C for recovery, slices  
445 were transferred into oxygenated aCSF containing (in mM): 125 NaCl, 2.5 KCl, 1.25 NaH<sub>2</sub>PO<sub>4</sub>, 2 CaCl<sub>2</sub>, 1 MgCl<sub>2</sub>,  
446 26 NaHCO<sub>3</sub>, 15 Sucrose, 10 Glucose (pH 7.2, 325 mOsm) at room temperature for the rest of the day and  
447 individually transferred to a recording chamber continuously perfused at 2 ml/min with oxygenated aCSF. Patch  
448 pipettes (4–8 M $\Omega$ ) were pulled from thin wall borosilicate glass (G150TF-3, Warner Instruments) using a  
449 micropipette puller (P-87, Sutter Instruments, Novato, CA) and filled with a KGlu based intra-pipette solution  
450 containing (in mM): 116 K-gluconate, 10-20 HEPES, 0.5 EGTA, 6 KCl, 2 NaCl, 4 ATP, 0.3 GTP and 2 mg/mL  
451 biocytin (pH adjusted to 7.2). Transfected VTA DA cells were visualized using an upright microscope coupled with  
452 a Dodt contrast lens and illuminated with a white light source (Scientifica). To characterize CatCh expression, a  
453 460 nm LED (CoolLED) was used both for visualizing YFP positive cells (using a bandpass filter cube) and for

454 optical stimulation through the microscope (1s continuous for light-evoked current in voltage-clamp mode and 8 Hz  
455 with 5 ms/pulses to drive neuronal firing in current-clamp mode). Regarding Jaws expression, continuous  
456 photostimulation (20 s), with a 525 nm, pE-2, CoolLED, was used in current-clamp (-60 mV). Whole-cell recordings  
457 were performed using a patch-clamp amplifier (Axoclamp 200B, Molecular Devices) connected to a Digidata (1550  
458 LowNoise acquisition system, Molecular Devices). Signals were low pass filtered (Bessel, 2 kHz) and collected at  
459 10 kHz using the data acquisition software pClamp 10.5 (Molecular Devices). All the electrophysiological recordings  
460 were extracted using Clampfit (Molecular Devices) and analyzed with R.

461

### 462 ***In vivo* juxtacellular recordings of VTA DA neurons**

463 Mice were deeply anaesthetized with chloral hydrate (8%), 400 mg/kg IP, supplemented as required to maintain  
464 optimal anesthesia throughout the experiment. The scalp was opened and a hole was drilled in the skull above the  
465 location of the VTA. Extracellular recording electrodes were constructed from 1.5 mm O.D. / 1.17 mm I.D.  
466 borosilicate glass tubings (Harvard Apparatus) using a vertical electrode puller (Narishige). Under microscopic  
467 control, the tip was broken to obtain a diameter of approximately 1  $\mu$ m. The electrodes were filled with a 0.5% NaCl  
468 solution containing 1.5% of Neurobiotin tracer (AbCys) yielding impedances of 6-9 M $\Omega$ . Electrical signals were  
469 amplified by a high-impedance amplifier (Axon Instruments) and monitored through an audio monitor (A.M. Systems  
470 Inc.). The signal was digitized, sampled at 25 kHz and recorded using Spike2 software (Cambridge Electronic  
471 Design) for later analysis. The electrophysiological activity was sampled in the central region of the VTA  
472 (coordinates: between 3.1 to 4 mm posterior to bregma, 0.3 to 0.7 mm lateral to midline, and 4 to 4.8 mm below  
473 brain surface). Individual electrode tracks were separated from one another by at least 0.1 mm in the horizontal  
474 plane. Spontaneously active DA neurons were identified based on previously established electrophysiological  
475 criteria <sup>54,55</sup>

476

### 477 **Fluorescence immunohistochemistry**

478 After euthanasia, induced by IP injection of euthazol (0.1 mL per 30 g at 150 mg/kg) or by paraformaldehyde (PFA)  
479 intra-cardiac perfusion, brains were rapidly removed and fixed in 4% PFA. Following a period of fixation at 4°C,  
480 serial 60- $\mu$ m sections were cut from the midbrain with a vibratome. Immunohistochemistry was performed as  
481 follows: free-floating VTA brain sections were incubated 1h at 4°C in a blocking solution of phosphate-buffered  
482 saline (PBS) containing 3% Bovine Serum Albumin (BSA, Sigma A4503) and 0.2% Triton X-100 and then incubated  
483 overnight at 4°C with a mouse anti-tyrosine hydroxylase antibody (TH, Sigma, T1299) at 1:200 dilution in PBS  
484 containing 1.5% BSA and 0.2% Triton X-100. The following day, sections were rinsed with PBS and then incubated  
485 for 3h at 22–25 °C with Cy3-conjugated anti-mouse (Jackson ImmunoResearch, 715-165-150) at 1:200 dilution in  
486 a solution of 1.5% BSA in PBS, respectively. After three rinses in PBS, slices were wet-mounted using Prolong  
487 Gold Antifade Reagent (Invitrogen, P36930). Microscopy was carried out with a fluorescent microscope Leica DMR,  
488 and images captured in grey level using MetaView software (Universal Imaging Corporation) and colored post-  
489 acquisition with ImageJ.

490

491 For the optogenetic experiments on DAT<sup>ICRE</sup> mice, an immunohistochemical identification of the transfected  
492 neurons was performed as described above, with an addition of chicken anti-eYFP antibodies (Life technologies  
493 Molecular Probes, A-6455), at 1:500 dilution. A goat-anti-chicken AlexaFluor 488 secondary antibody (711-225-  
494 152, Jackson ImmunoResearch) at 1:500 dilution (Life Technologies) was then used in a solution of 1.5% BSA in  
495 PBS. Neurons co-labelled for TH and YFP in the VTA allowed to confirm their neurochemical phenotype and the  
496 transfection success.

497

#### 498 **Intracranial self-stimulation (ICSS) bandit task**

499 *Behavioral set up:* The ICSS bandit task took place in a circular open field with a diameter of 67 cm. Three explicit  
500 square-shaped marks (1x1 cm) were placed in the open field, forming an equilateral triangle (side = 35 cm). Entry  
501 in the circular zones (diameter = 6 cm) around each mark was associated with the delivery of a rewarding ICSS  
502 stimulation. Experiments were performed using a video camera, connected to a video-tracking system, out of sight  
503 of the experimenter. A LabVIEW (National Instruments) application precisely tracked and recorded the animal's  
504 position with a camera (20 frames/s). When a mouse was detected in one of the circular rewarding zones, an  
505 electrical stimulator received a TTL signal from the software application and generated a 200 ms-train of 0.5-ms  
506 biphasic square waves pulsed at 100 Hz (20 pulses per train). ICSS intensity was adjusted, within a range of 20 to  
507 200  $\mu$ A, during training (see training settings) and then kept constant, so that mice would achieve between 50 and  
508 150 visits per session (5min duration) for two successive sessions, and then kept constant for all the experiment.  
509 Mice with insufficient scores in the PS and DS (<40 visits despite increasing the maximum intensity of 200  $\mu$ A) were  
510 excluded.

511

512 *Training setting:* The training consisted of two settings: the deterministic setting (DS) and the probabilistic setting  
513 (PS), both consisting of 10 daily sessions of 5 min. In the DS, all zones were associated with an ICSS delivery (P  
514 = 100%). However, two consecutive rewards could not be delivered on the same target, which motivates mice to  
515 alternate between targets. In the PS, the zones were associated with three different probabilities (P = 25%, P =  
516 50%, P = 100%) to obtain an ICSS stimulation. The probabilities locations were pseudo-randomly assigned per  
517 mouse.

518

519 *Data acquisition per experimental group:* Different experimental groups underwent the ICSS bandit task. Firstly,  
520 locomotion and choice behavior of the mice, which had been implanted with osmotic mini-pumps (Sal = 23, Nic =  
521 27), were analyzed and compared between the last two days of both training settings (days 9&10 (DS) + days 9&10  
522 (PS)). For optogenetics experiments, the DAT<sup>ICRE</sup> mice (n = 21) completed the training, followed by a schedule of  
523 4 days of paired sessions with photo-stimulation (ON) alternated with days without photostimulation (OFF). The  
524 averages of the ON and OFF days were compared in a paired manner. The Ctl animals (n = 55) were obtained by  
525 pooling together mice implanted with a saline mini-pump (n = 23) and non-implanted mice (n = 32). Figure 1 used  
526 data from the non-implanted mice group. Figure 2,3,4 used the pooled Ctl group.

527



528 *Behavioral measures:* For all of those groups, the following measures were analyzed and compared in the PS, as  
529 well as in the DS for the Sal vs Nic experiment: i) number of visits, ii) time-to-goal, iii) choice repartition (proportion  
530 of visits  $p_{25}$ ,  $p_{50}$  and  $p_{100}$ ), iv) percentage of directional changes ( $n^{\text{th}}$  visit =  $n^{\text{th}}$  visit+2). Furthermore, the ICSS bandit  
531 task can be seen as a Markovian decision process. Every transition between zones can be considered as a binary  
532 choice between two probabilities, since the occupied zone cannot be reinforced twice in a row. The sequence of  
533 choices per session is summarized by the proportional result of the sum of three specific binary choices (or  
534 gambles, i.e., total visits zone 1/total visits zone 1+2). The three gambles (G) were named after the point on which  
535 the mouse is positioned at the time of the choice:  $G_{25} = 100\% \text{ vs } 50\%$ ,  $G_{100} = 50\% \text{ vs } 25\%$  and  $G_{50} = 100\% \text{ vs } 25\%$ .  
536 The target choice in these gambles reflects the balance between exploitative (choosing the most valuable  
537 option) and exploratory (choosing the least valuable option) choices. With a softmax based decision-making model  
538 fitted in the laboratory, we computed three parameters: the value sensitivity or inverse temperature (the power to  
539 discriminate between values in a binary choice), the uncertainty bonus (the preference for expected uncertainty,  
540 considering the reward variance of every option in a binary choice) and the motor cost to do a directional change  
541 (a decrease in the target value if it requires to go back to the previous target).

542  
543 *Modeling:* Decision-making models determined the probability  $P_i$  of choosing the next state  $i$ , as a function (the  
544 “choice rule”) of a “decision variable”. Because mice could not return to the same rewarding target, they had to  
545 choose between the two remaining ones. Accordingly, we modeled decisions between two alternatives labelled A  
546 and B and used a softmax choice rule defined by  $P_A = 1 / (1 + e^{-\beta(V_A - V_B)})$  where  $\beta$  is an inverse temperature parameter  
547 reflecting the sensitivity of choice to the difference between decision variables and  $V_i$  the value of an option. The  
548 value  $V$  of an option is modelled as the expected (average) reward + expected uncertainty + U-turn cost<sup>16,30</sup>. This  
549 compound value is then nested in the softmax choice rule, given a 6\*3 matrix that described the probability of a  
550 choice between A, B and C (the three targets) depending on the two previous choices. As an example, in the  
551 probability to choose (A, B, C) after performing the sequence BA, the value is given by  $(0, p_b + \varphi * p_b * (1 - p_b) - \kappa, p_c$   
552  $+ \varphi * p_c * (1 - p_c))$  while after the sequence CA the value is given by  $(0, p_b + \varphi * p_b * (1 - p_b), p_c + \varphi * p_c * (1 - p_c) - \kappa)$  (same  
553 for AB, CB and AC, BC). The free parameters of the model ( $\beta$ ,  $\varphi$ ,  $\kappa$ ) were fitted by maximizing the data likelihood.  
554 Given a sequence of choice  $c = c_{1..T}$ , data likelihood is the product of their probability (given by Equation 1)<sup>56</sup>. We  
555 used the *optim* function in R to perform the fits, with the constraints that  $\beta \in ]0, 10]$ ,  $\varphi \in ]0, 5]$  and  $\kappa \in ]0, 5]$ .

556  
557 *Statistical analysis:* All statistical analyses were computed using R (The R Project, version 4.0.0) and Python with  
558 custom programs. Results were plotted as a mean  $\pm$  s.e.m. The total number ( $n$ ) of observations in each group and  
559 the statistics used are indicated in figure legends. Classical comparisons between means were performed using  
560 parametric tests (Student's T-test, or ANOVA for comparing more than two groups) when parameters followed a  
561 normal distribution (Shapiro test  $P > 0.05$ ), and non-parametric tests (here, Wilcoxon or Mann-Whitney) when the  
562 distribution was skewed. Multiple comparisons were Bonferroni corrected. Probability distributions were compared  
563 using the Kolmogorov–Smirnov (KS) test, and proportions were evaluated using a chi-squared test ( $\chi^2$ ).

564 All statistical tests were two-sided except for the optogenetic experiment (Figure 5) where statistical tests were  
565 one-sided (we test hypotheses driven by nicotine effect and model).  $P > 0.05$  was considered not to be statistically  
566 significant. For archetypal analysis, all computations and graphics have been done using the statistical software R  
567 and the archetype package (version 2.2-0.1). Briefly, given an  $n \times m$  matrix representing a multivariate data set  
568 with  $n$  observations ( $n$  = number of animals) and  $m$  attributes (here  $m = 7$ , consisting of the directional changes,  
569 the target distributions (3 values) and the three gambles (see data Figure 1 C-E)), the archetypal analysis finds the  
570 matrix  $Z$  of  $k$   $m$ -dimensional archetypes ( $k$  is the number of archetypes).  $Z$  is obtained by minimizing  $\|X - \alpha Z^T\|_2$ ,  
571 with  $\alpha$  the coefficients of the archetypes ( $\alpha_{i,1..k} \geq 0$  and  $\sum \alpha_{i,1..k} = 1$ ), and  $\|\cdot\|_2$  a matrix norm. The archetype is also  
572 a convex combination of the data points  $Z = X^T \delta$ , with  $\delta \geq 0$  and their sum must be 1<sup>57</sup>. The  $\alpha$ -coefficient depicts  
573 the relative archetypal composition of a given observation. For  $k = 3$  archetypes and an observation  $i$ ,  $\alpha_{i,1}$ ,  $\alpha_{i,2}$ ,  $\alpha_{i,3}$   
574  $\geq 0$  and  $\alpha_{i,1} + \alpha_{i,2} + \alpha_{i,3} = 1$ . A ternary plot can then be used to visualize data. ( $\alpha_{i,1}$ ,  $\alpha_{i,2}$ ,  $\alpha_{i,3}$ ) are used to assign  
575 individual behavior to its nearest archetype (i.e.,  $k \max(\alpha_{i,1}, \alpha_{i,2}, \alpha_{i,3})$ ).  $\alpha_{ij}$  are also used as variable to estimate  
576 population archetypal composition. For figure 4E, archetypal composition ( $0 \leq \alpha_{ij} \leq 1$ ) was binned into five intervals.  
577 Pure archetype corresponds to 1, the archetypal composition decreases linearly with increasing distance from the  
578 archetype, 0 correspond to points on the opposite side.

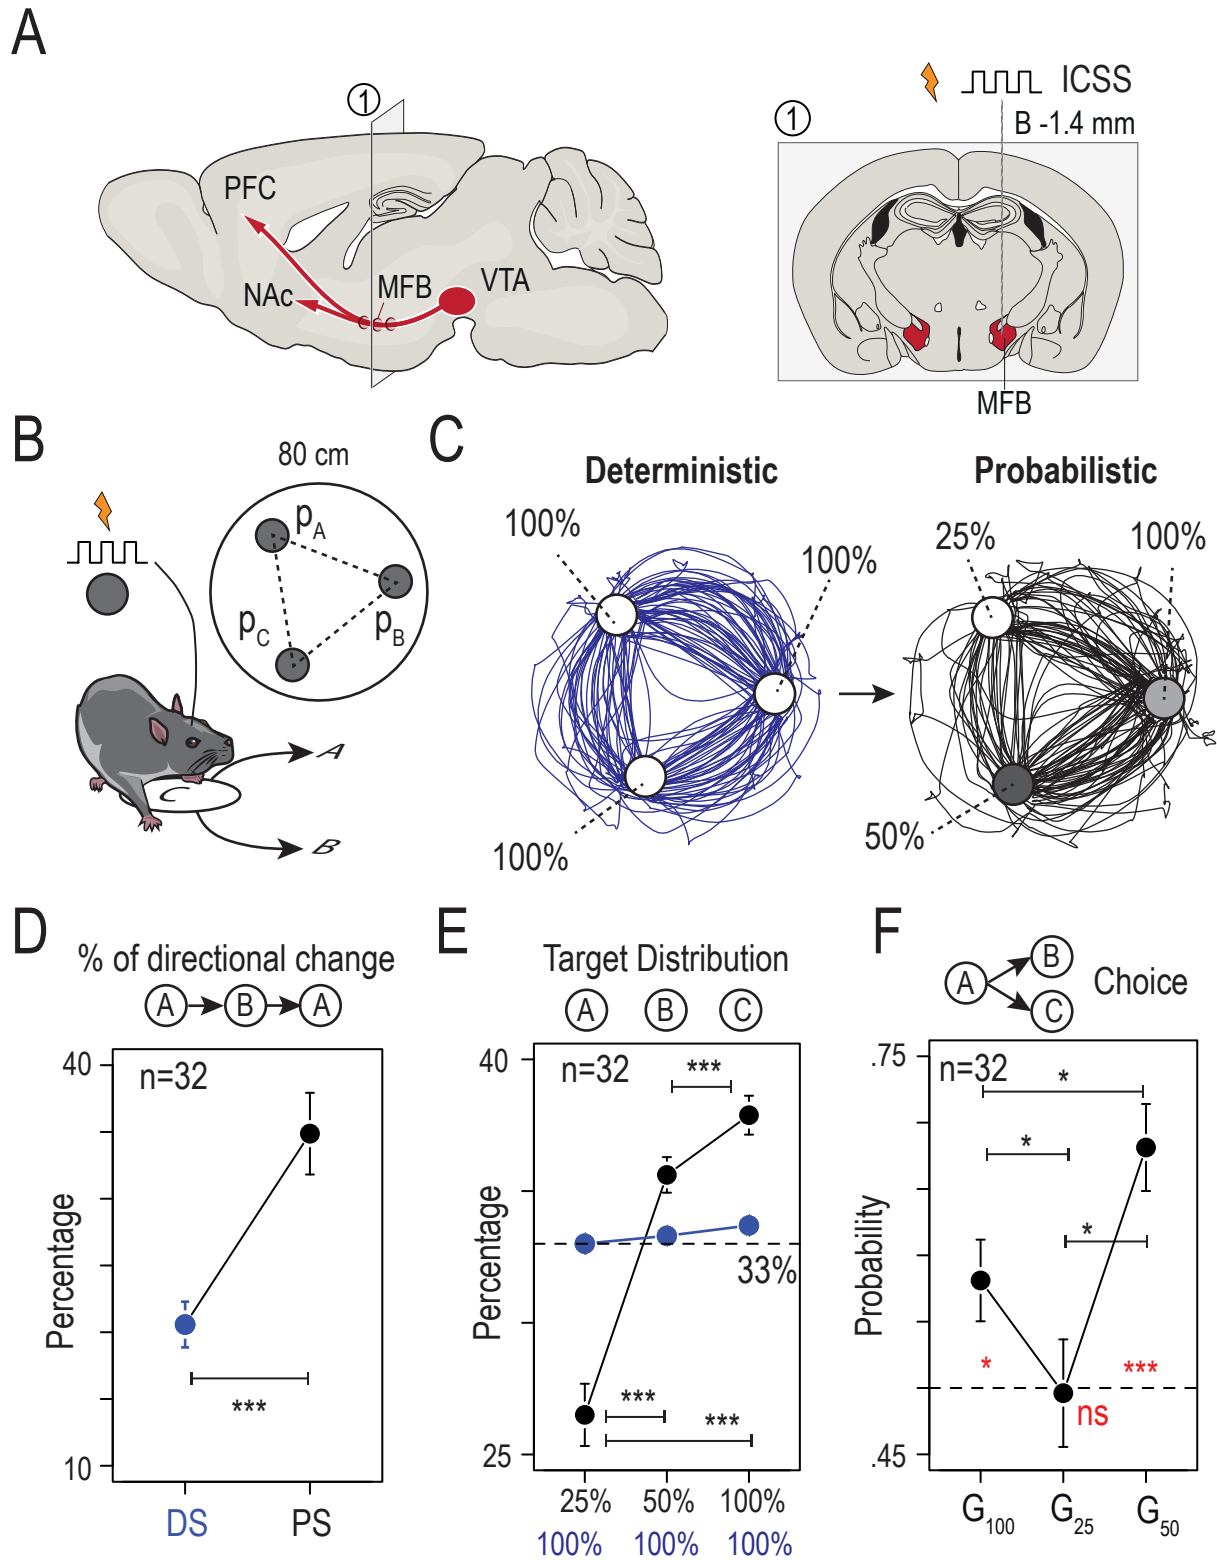

Figure 1

579 **Figure 1: Mice exhibited suboptimal behavior and exploratory choices in a spatial version of a multi-armed**  
580 **bandit task with probabilistic settings**

581 (A) Mice were implanted unilaterally with bipolar stimulation electrodes to deliver electrical stimulation at the level  
582 of the medial forebrain bundle in order to support intracranial self-stimulation (ICSS) behavior. *Right:* A coronal  
583 section of the mouse brain illustrating a representative electrode positioned in the MFB at Bregma -1.4 mm AP. (B)  
584 Schematic of the behavioral paradigm: mice are placed in a circular open-field (interior diameter = 80 cm), with  
585 three equidistant targets (A, B, and C - labelled on the open field floor) that are associated with a given probability  
586 ( $P_A, P_B, \text{ or } P_C$ ) of ICSS reward delivery when the animal is detected in a 60 mm zone around the target. (C) Sample  
587 trajectories for one mouse under the deterministic setting (DS) of the task, in which each of the three targets were  
588 rewarded by an ICSS with  $P = 100\%$  (left panel, blue), and in the probabilistic setting (PS), in which the three targets  
589 were associated with distinct probabilities of ICSS delivery ( $P_A = 100, P_B = 50$  and  $P_C = 25\%$ ) (right panel, black).  
590 Two stimulations could not be delivered consecutively in the same zone, therefore animals learned to alternate  
591 between targets with a circular pattern in the DS (blue), and a less stereotyped pattern in the PS (black). (D)  
592 Comparison of the percentage of directional changes during DS (blue) and PS (black) (Wilcoxon signed rank test,  
593  $p < 0.001, n = 33$ ). (E) Repartition of visits to the three targets. Under the DS (blue), animals distributed uniformly  
594 their choices of visiting each of the three options (around 33%, Friedman rank sum test,  $p = 0.82$ ). During the PS  
595 (black), animals reorganized their behavior and visited more frequently options with greater probabilities of reward  
596 (Friedman rank sum test,  $p < 0.001$ , and paired Wilcoxon Test  $p < 0.001$  for the three comparisons,  $n = 33$ ). (F)  
597 Probability to choose the option with the highest probability of reward for the three possible gambles:  $G_{100}$  = choice  
598 of 50% over 25%,  $G_{25}$  = choice of 100% over 50 and  $G_{50}$  = choice of 100% over 25%. Red asterisk: Comparison  
599 with a true mean of 0.5 (One Sample t-test with Holm correction,  $n = 33$ ) for  $G_{100}$  ( $p = 0.026$ ),  $G_{25}$  ( $p = 0.92$ ) and  
600  $G_{50}$  ( $p < 0.001$ ). Black asterisk: Paired comparison (Paired t-test with Holm correction,  $n = 33$ ) for  $G_{100}$ - $G_{25}$  ( $p =$   
601  $0.03$ ),  $G_{100}$ - $G_{50}$  ( $p = 0.048$ ) and  $G_{25}$ - $G_{50}$  ( $p = 0.025$ ).

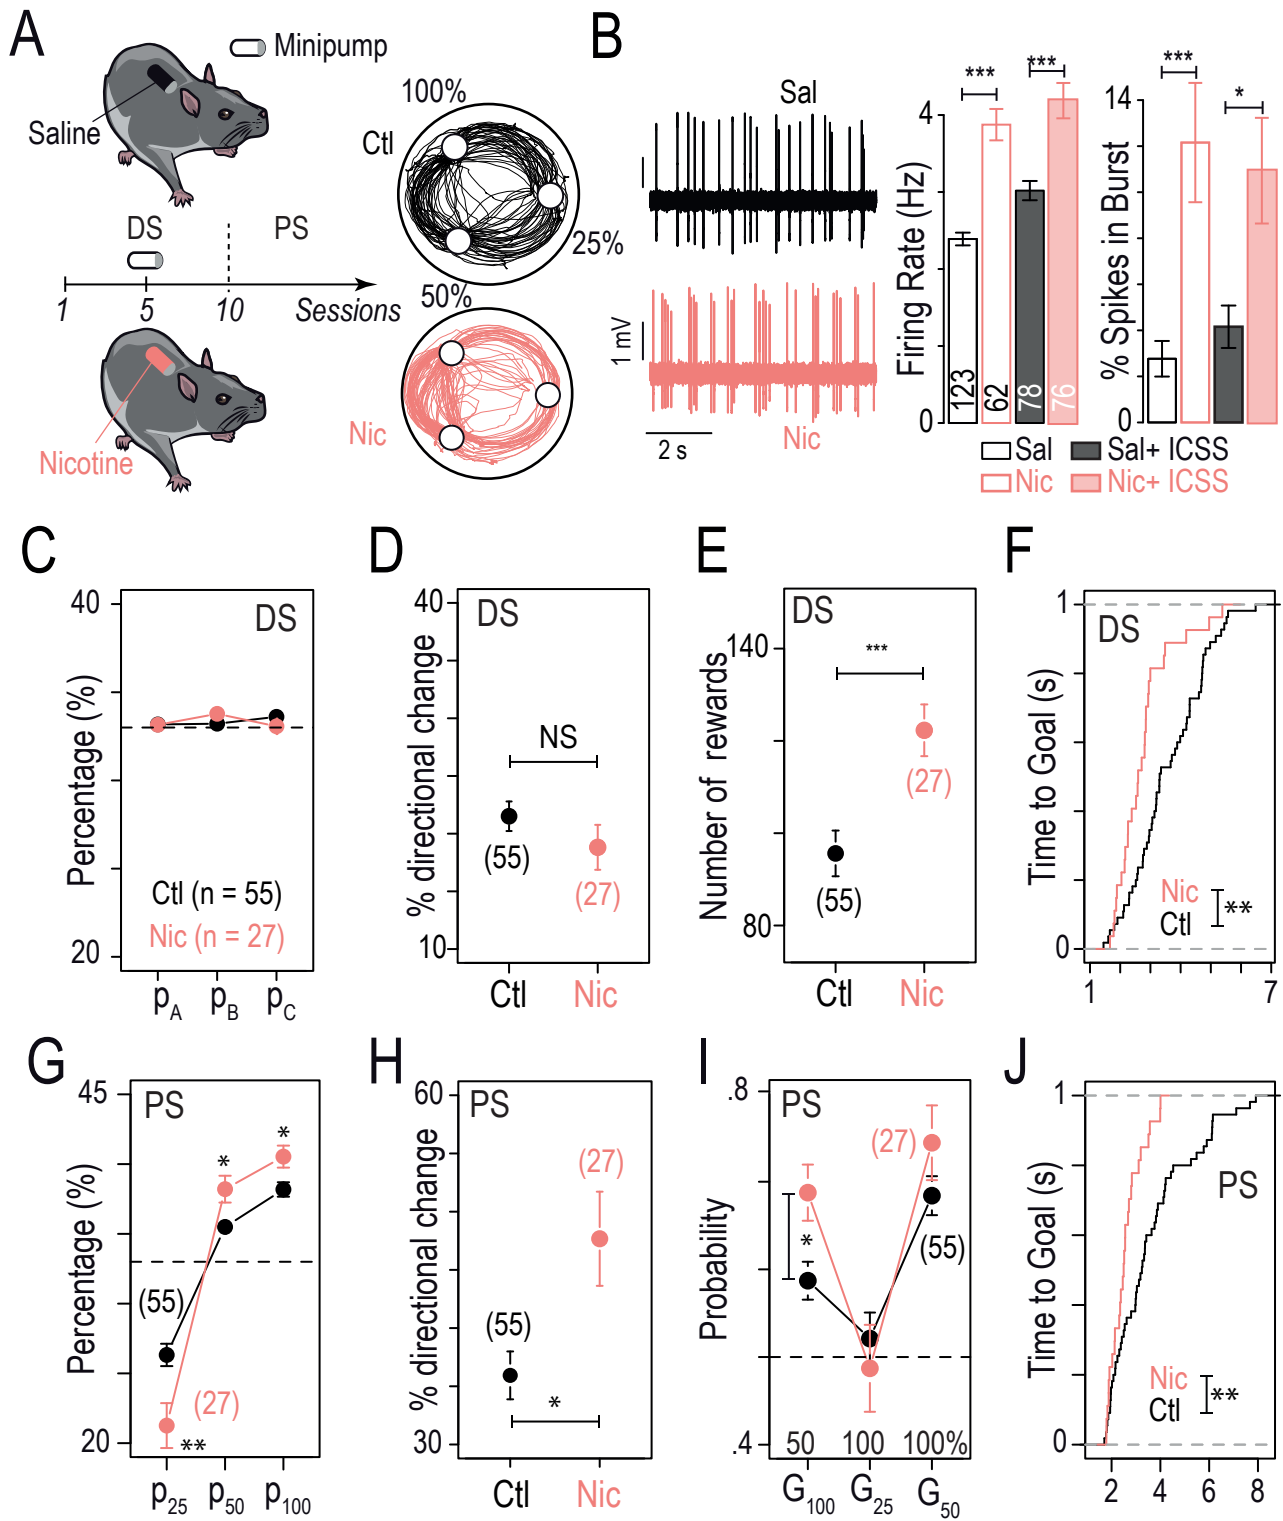

Figure 2

602 **Figure 2: Chronic exposure to nicotine altered both spontaneous DA activity and choice strategies.**

603 (A) *Left*: Timeline of the task. Subcutaneous osmotic mini-pumps delivering nicotine (10 mg/kg/day), or saline for  
604 control animals, were implanted on day 5 of the DS. *Right*: Sample trajectories at the end of the PS for a mouse  
605 under chronic nicotine (Nic, in pink) and a mouse naive to nicotine (Ctl, in black). (B) *Left*: Representative  
606 electrophysiological recordings of VTA DA neurons after chronic saline (Sal, black) or nicotine (Nic, red) exposure.  
607 *Right*: The firing frequency and bursting activity of VTA DA neurons were compared between two sets of conditions:  
608 saline (n = 123) versus nicotine minipump (n = 62), and saline minipump + ICSS (n = 78) versus nicotine minipump  
609 + ICSS (n = 76) after completion of the PS. All electrophysiological experiments were performed after  $24 \pm 2$  days  
610 of Sal or Nic (10 mg/kg/day) exposure. Nicotine exposure increased both DA neuron firing frequency (two-way  
611 ANOVA, nicotine effect  $F_{(1,335)} = 72.42, p < 0.001$ ) and bursting activity ( $F_{(1,335)} = 25.39, p < 0.001$ ), with or without  
612 ICSS. This increase was observed between the Sal and Nic minipump-only conditions (*post hoc* Tukey HSD, firing  
613 frequency  $p < 0.001$ , bursting activity  $p < 0.001$ ), as well as after Nic minipump + ICSS compared to Sal minipump  
614 + ICSS (*post hoc* Tukey HSD, firing frequency  $p < 0.001$ , bursting activity  $p = 0.02$ ). Mean firing frequency was  
615 increased after ICSS in both the Sal and Nic groups (two-way ANOVA, ICSS effect  $F_{(1,335)} = 21.53, p < 0.001$ ), but  
616 bursting activity was unchanged after ICSS ( $F_{(1,335)} = 1.02, p = 0.31$ ). No interaction effect was observed for firing  
617 frequency ( $F_{(1,335)} = 1.02, p = 0.31$ ) nor bursting activity ( $F_{(1,335)} = 0.65, p = 0.42$ ). (C-F) Comparison between mice  
618 exposed to chronic nicotine (Nic, in pink, n = 27) and control mice (Ctl, n = 55) at the end of the DS, regarding (C)  
619 the target repartition (i.e.,  $P_A, P_B$  and  $P_C$ ,  $p > 0.05$ ), (D) the percentage of directional changes (Student's t-test,  
620  $p > 0.05$ ), (E) the number of rewards (Student's t-test,  $***p < 0.001$ ) and (F) the cumulative distribution of the average  
621 time-to-goal (KS test,  $**p < 0.01$ ). (G-J) Comparison between mice exposed to chronic nicotine (Nic, in pink, n =  
622 27) and control mice (Ctl, n = 55) at the end of the PS, regarding: (G) the target repartition. Nic mice visited more  
623 often the options with a higher reward probability (i.e.  $P_{50}$  and  $P_{100}$ ) and less often the option with the lowest  
624 probability ( $P_{25}$ ) in comparison to Ctl mice (student t-test with Holm correction for multiple comparisons,  $**p = 0.006$ ,  
625  $*p = 0.011$ ,  $*p = 0.012$ , respectively). (H) Percentage of directional changes (Student's t-test,  $*p = 0.02$ ); (I)  
626 Probability of making the exploitative choice (i.e., the one with the highest probability of reward) for the three  
627 possible gambles for Nic and Ctl mice (Student's t-test with Holm correction for multiple comparisons,  $*p = 0.03$ )  
628 and (J) the cumulative distribution of the average time-to-goal (KS test,  $**p < 0.01$ ).

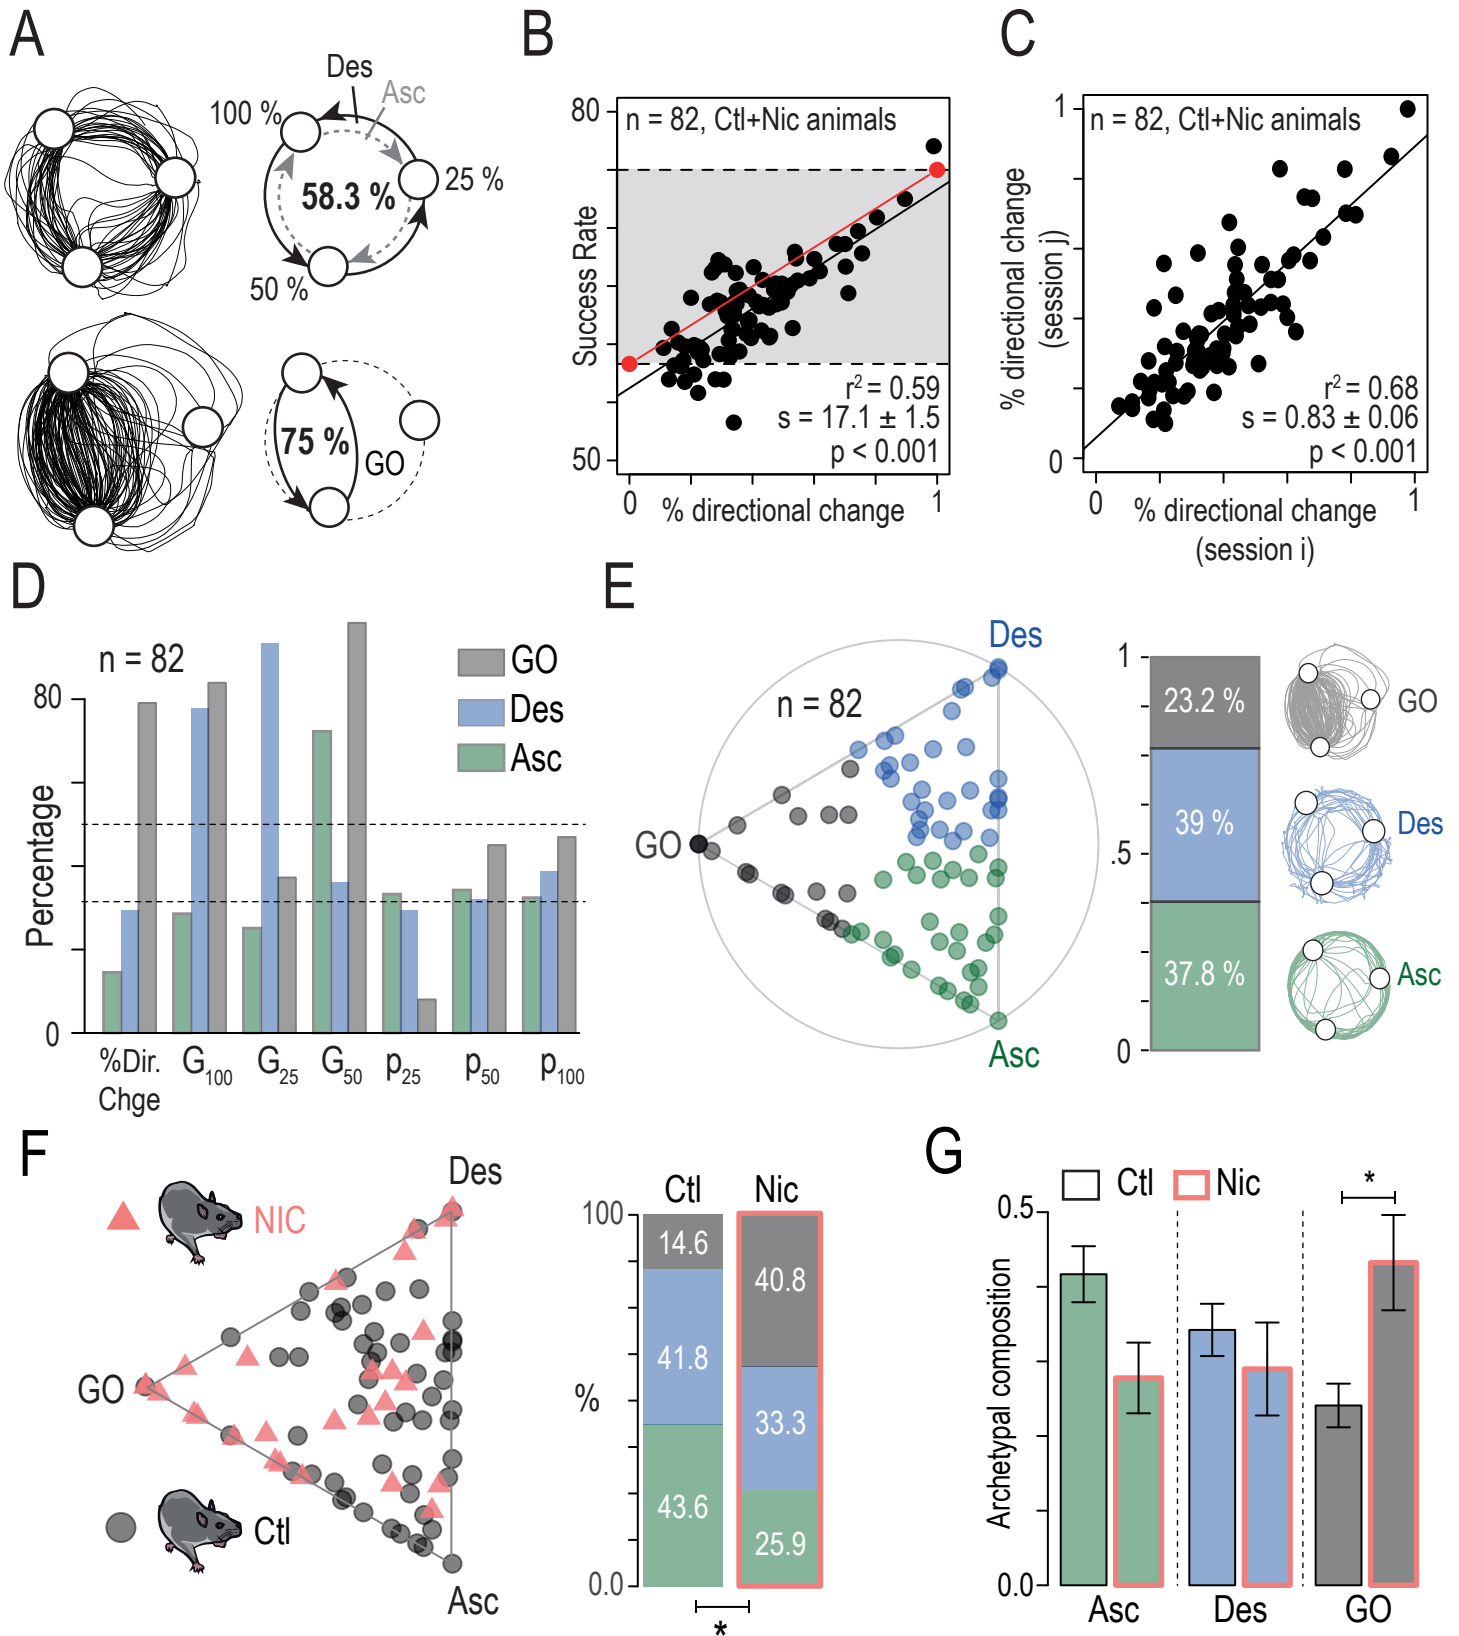

Figure 3

629 **Figure 3: Mice exhibited inter-individual differences in choice strategies which were differentially affected**  
630 **by chronic nicotine exposure**

631 (A) *Left*: Sample trajectories in the PS, corresponding to different choice strategies, a circular strategy (*top*) and a  
632 gain-optimizing strategy (*bottom*). *Right*: A mouse using a purely circular strategy (top, descending Des or  
633 ascending Asc) in the PS will tend to a 58.3 % success rate, whereas a mouse that always avoids  $p_{25}$  and alternates  
634 between  $p_{100}$  and  $p_{50}$  (bottom) will reach 75 % of success rate. (B) Correlation between the success rate and the  
635 percentage of directional changes. Mice displayed a strong inter-individual variability in their choice strategy but,  
636 overall, the higher the percentage of directional change, the higher the success rate (regression line in black). The  
637 red line indicates the linear correlation passing through two theoretical points: {0% directional changes; 58.3 %  
638 success rate} and {100 % directional changes; 75 % success rate}. (C) Correlation between the percentage of  
639 directional changes for two consecutive sessions. This measure showed a strong stability between consecutive  
640 sessions, indicating that the decision strategy was conserved across time for a given individual. (D-E) Archetypal  
641 analysis of the choice strategies based on 7-dimensional data space: i) the % of directional changes, ii) the gambles  
642  $G_{100}$ ,  $G_{25}$  and  $G_{50}$ , and iii) the distribution of choices between  $p_{25}$ ,  $p_{50}$ , and  $p_{100}$ . Analysis was performed on  $n = 82$   
643 mice (pooled Ctl and Nic mice). (D) Plot of the three archetypal solutions, gain-maximizers (GO), descending (Des)  
644 and ascending (Asc), and their 7 basic variables used in this analysis. (E) *Left*: Visualization of the  $\alpha$  coefficients  
645 using a ternary plot. Each point represents the projection of an individual onto the plane defined by a triangle where  
646 the three apices represent the three archetypes (GO, Des, and Asc). Points are color-coded according to their  
647 proximity to the archetypes. *Right*: Proportions of each archetype on the entire population: 37.8 % Asc (green), 39  
648 % Des (blue) and 23.2 % GO (grey). (F) *Left*: NIC (pink triangles) and Ctl (grey dots) mice displayed on the same  
649 ternary plot. Nic mice displayed a visual shift of their behavior towards the GO extrema of the archetype. *Right*:  
650 This shift was reflected by a difference in the proportion of each phenotype between Nic and Ctl groups ( $\chi^2$  test,  $p$   
651 = 0.027), with a higher proportion of GO mice in the Nic group. (G) Archetypal composition for each archetype (1 =  
652 closer to the apex) in Ctl and Nic mice (Wilcoxon test,  $p = 0.08$ ,  $p = 0.22$  and  $p = 0.04$ , with Holm correction).



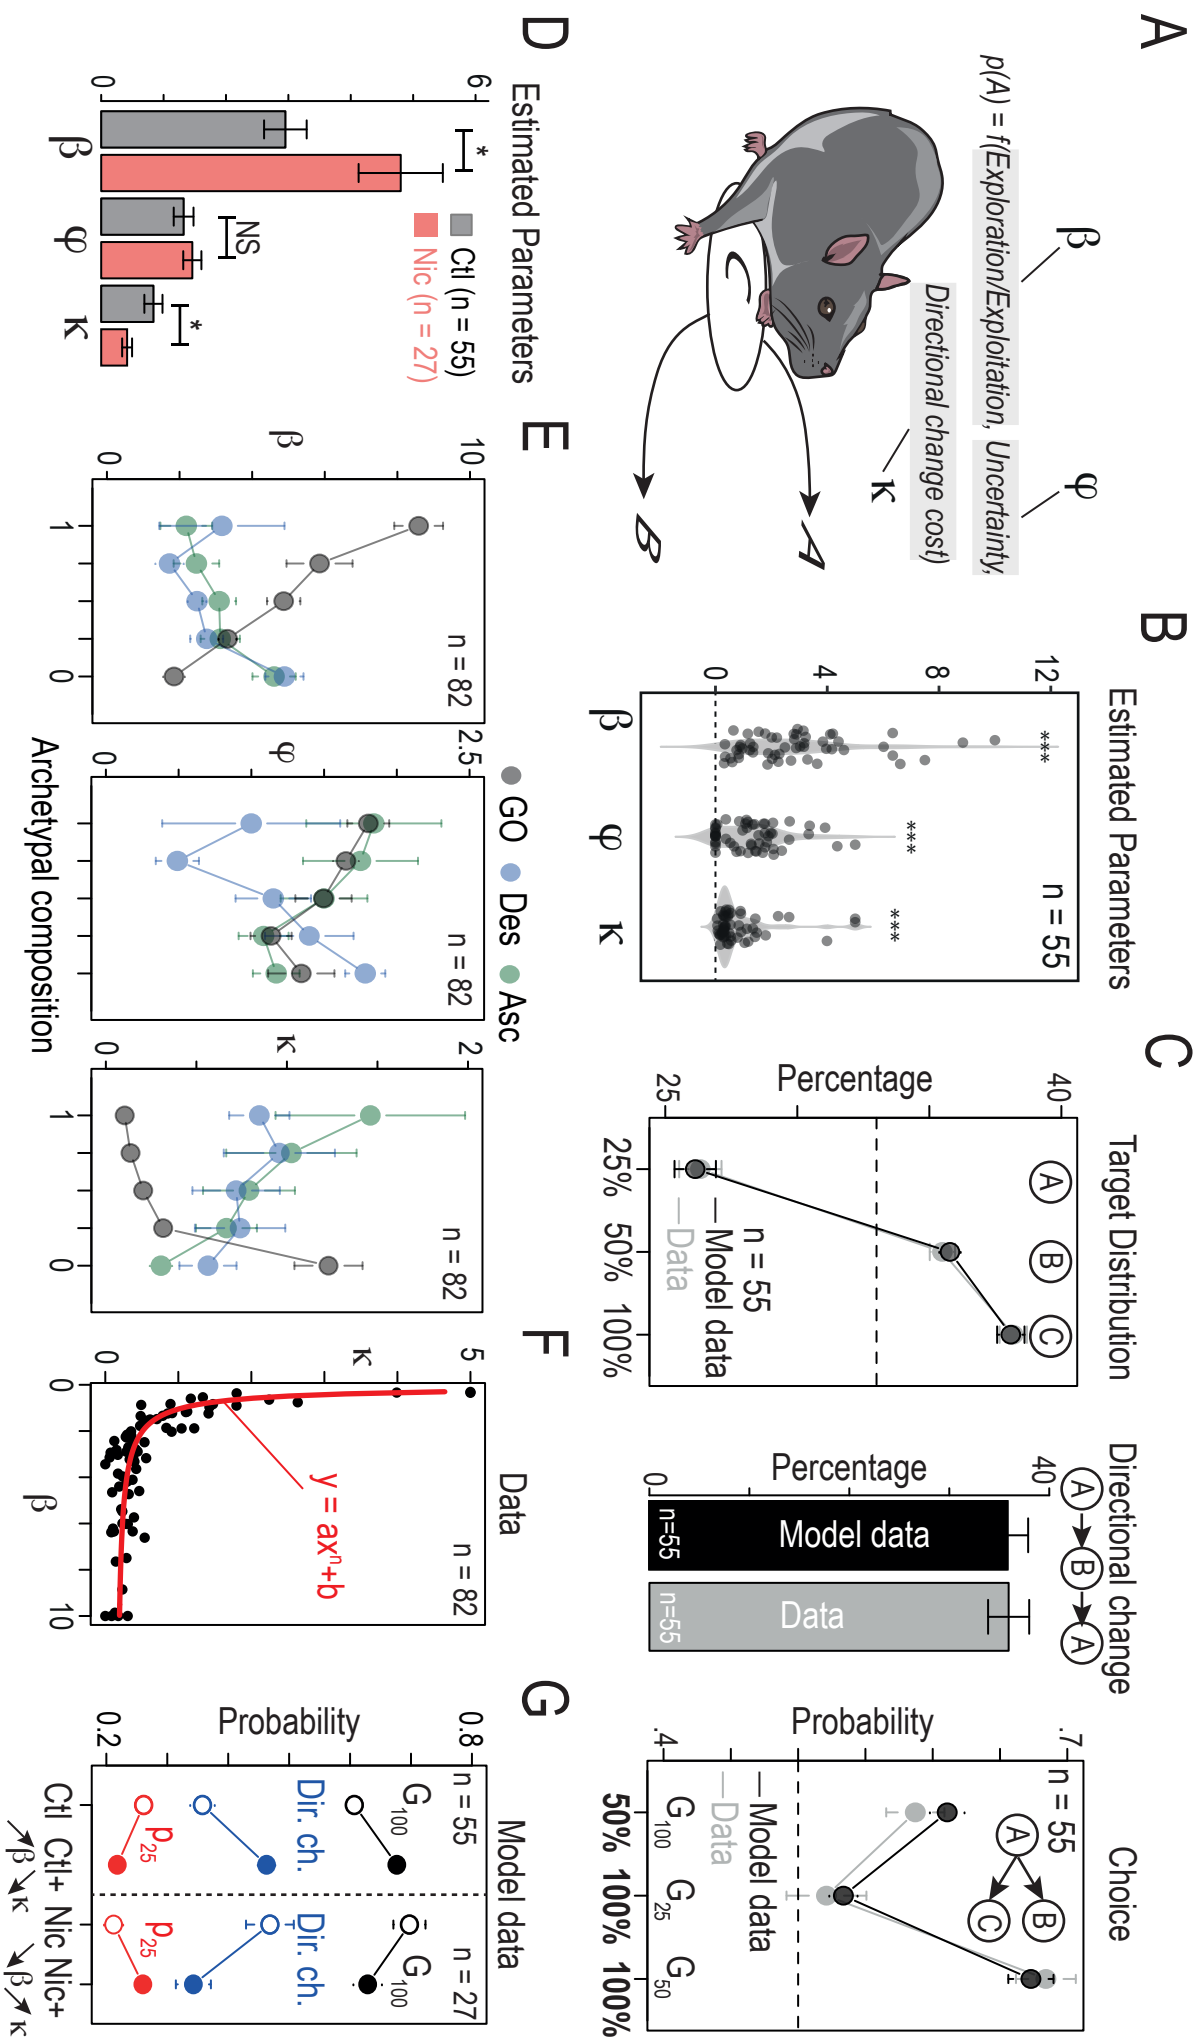

Figure 4

653 **Figure 4: Computational modeling suggests that decision parameters differ between the three archetypes**  
654 **and are differentially affected by nicotine exposure**

655 (A) Principle of the softmax model: softmax decision rule with three parameters  $\beta$  (inverse temperature or  
656 exploration/exploitation),  $\varphi$  (uncertainty bonus) and  $\kappa$  (cost or effort for a directional change). (B) Estimated values  
657 of  $\beta$ ,  $\varphi$  and  $\kappa$  parameters for the 55 Ctl mice (not exposed to nicotine, \*\*\* indicates a significant difference from  
658 zero). (C) Comparison between Ctl data and model for a model sequence of 2000 choices ( $n = 55$ ) simulated with  
659 fitted values of  $\beta$ ,  $\varphi$  and  $\kappa$  (see B) *Left*: Repartition of visits on the three targets ( $p_{25}$ ,  $p_{50}$  and  $p_{100}$ , with a mean of  
660 the differences between Ctl data and model of  $\Delta = 0.002\%$ ,  $-0.003\%$  and  $0.001\%$ ,  $p > 0.05$ ). *Middle*: Comparison  
661 of the percentage of directional changes ( $\Delta = 0.002$ ,  $p > 0.05$ ). *Right*: Probability to choose alternatives with the  
662 highest probability of reward for the three possible gambles ( $G_{100} = p_{50}$  over  $p_{25}$ ;  $G_{25} = p_{100}$  over  $p_{50}$ ;  $G_{50} = p_{100}$  over  
663  $p_{25}$ ,  $\Delta = -0.02$ ,  $-0.008$  and  $0.009$ ,  $p > 0.05$  for the three gambles). (D) Nicotine-exposed animals displayed an  
664 increase in  $\beta$  ( $\Delta = 1.85$ ,  $p = 0.03$ ), a decrease in  $\kappa$  ( $\Delta = -0.42$ ,  $p = 0.04$ ), but no difference in  $\varphi$  ( $\Delta = 0.14$ ,  $p > 0.05$ )  
665 compared to Ctl mice (Student's t-test with Holm correction for multiple comparisons). (E) *Left*: Correlation between  
666  $\beta$  (left),  $\varphi$  (middle) or  $\kappa$  (right) values and the archetypal composition for both Ctl and Nic mice ( $n = 82$ , see plot  
667 Figure 3B). The closer to the GO phenotype, the higher the  $\beta$  and the lower the  $\kappa$ , which is consistent with an  
668 optimal strategy based on alternation between  $p_{100}$  and  $p_{50}$ . The closer to the Des phenotype, the lower the  
669  $\varphi$  parameter. (F) Plot of the fitted  $\beta$  and  $\kappa$  parameters for both Ctl and Nic mice ( $n = 82$ ). Data are fitted with a  
670 polynomial function ( $y = ax^n + b$ ) (G) Mimicking the effect of nicotine on the model parameters. *Left*: The simulation  
671 of choice behavior when nicotine-induced increase of  $\beta$  and decrease of  $\kappa$  are added to the Ctl model parameters  
672 ( $n = 55$ , Ctl +  $\nearrow\beta \searrow\kappa$ ) recapitulates the effect of nicotine on the three choice parameters (the probability to choose  
673 the most valuable option in gamble  $G_{100}$ ; the percentage of directional changes, and the probability to visit  $p_{25}$ ,  
674 mean of the differences between Nic data and model  $\Delta = 0.01\%$ ,  $-0.005\%$ ,  $0.01\%$ , respectively, Student's t-test,  $p$   
675  $> 0.05$ ). Starting from the Nic mice parameters and removing the nicotine-induced changes on  $\beta$  and  $\kappa$  ( $n = 27$ , Nic  
676 +  $\searrow\beta \nearrow\kappa$ ) reestablish those three parameters at the level of Ctl mice (mean of the differences between Ctl data  
677 and model  $\Delta = 0.02\%$ ,  $-0.0006\%$ ,  $-0.03\%$ , respectively, Student's t-test,  $p > 0.05$ ).  $\Delta\beta$  is calculated using  $\beta_{Nic} - \beta_{Ctl}$   
678 the mean estimated in Ctl and Nic condition.  $\kappa$  is determined using the non-linear relationship between  $\beta$  and  
679  $\kappa$  (see F).

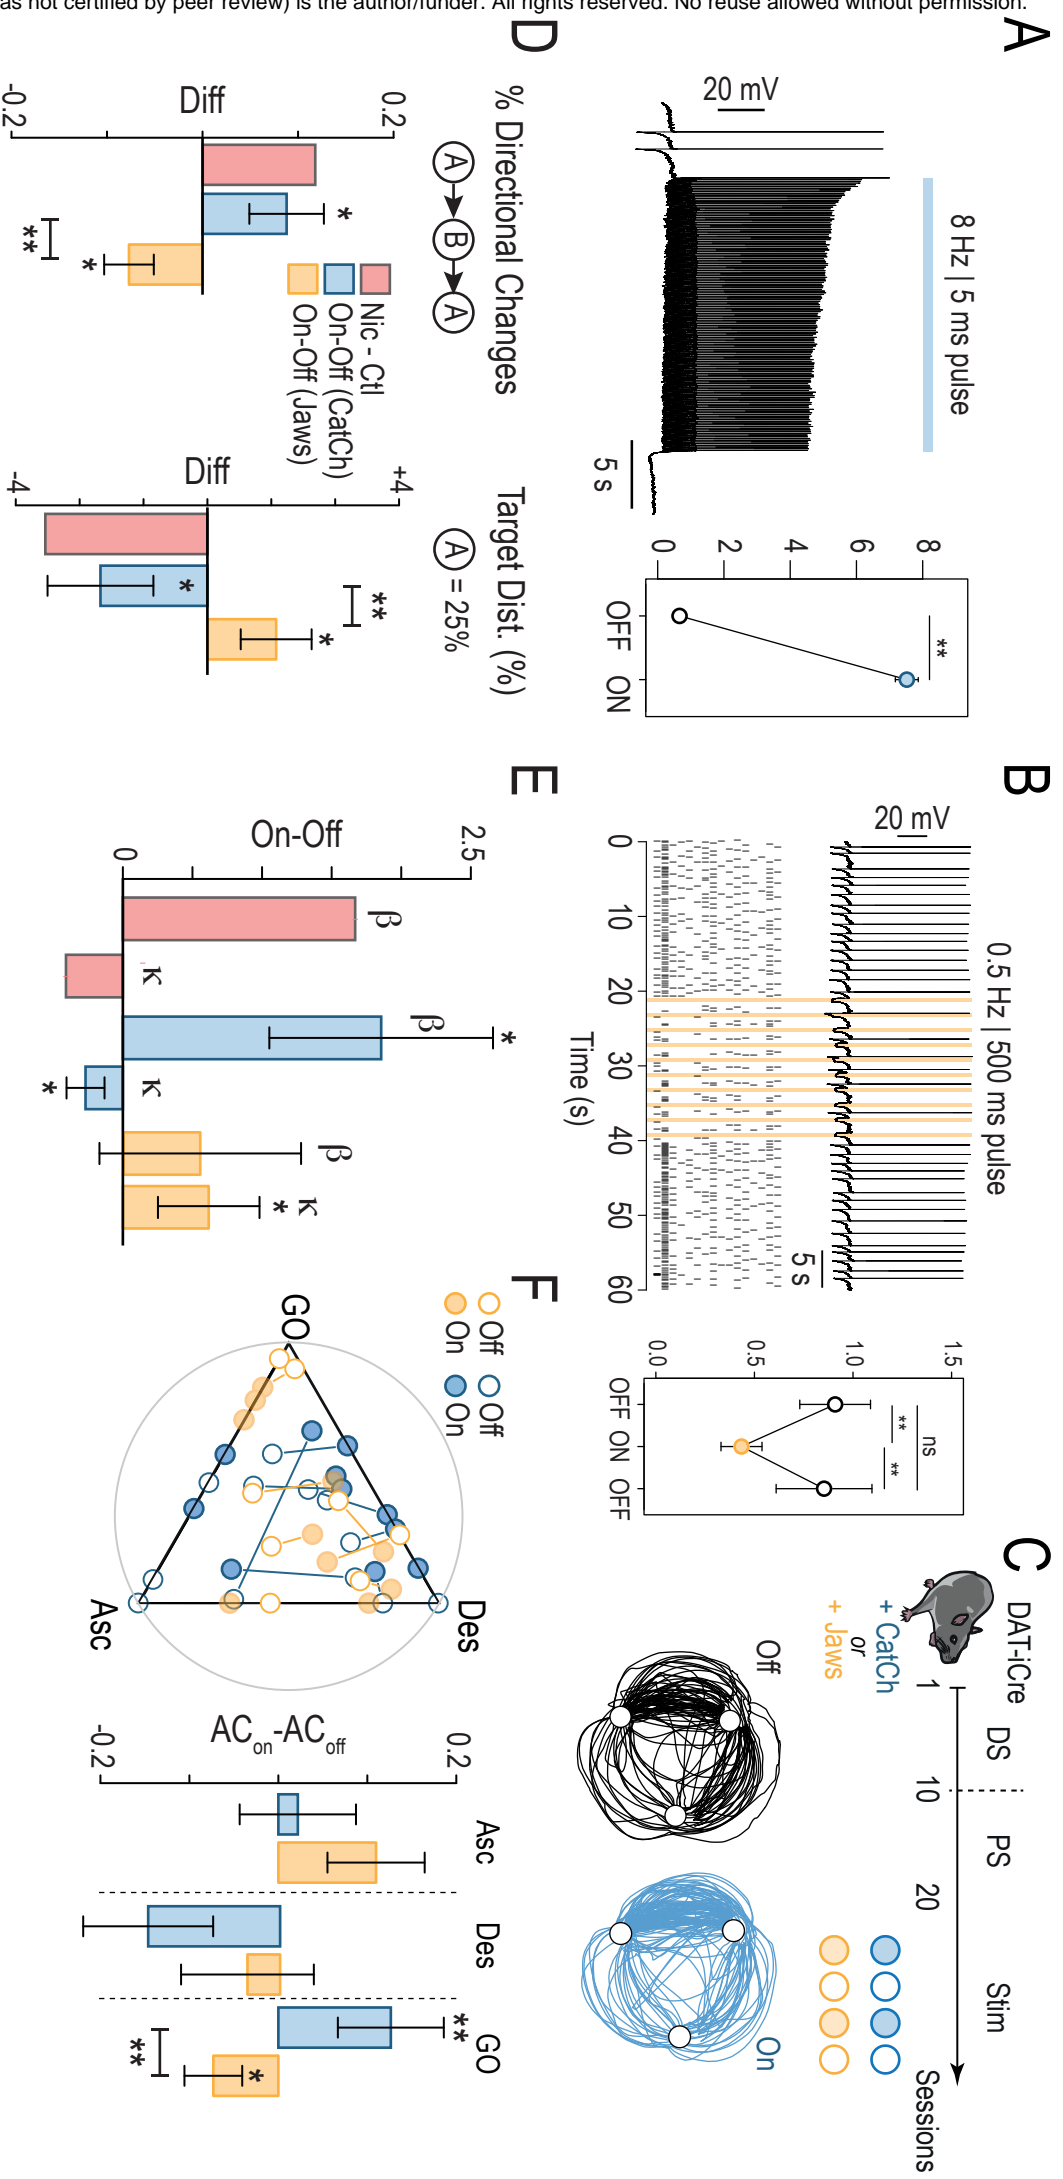

Figure 5

680 **Figure 5: Optogenetic manipulation of VTA DA neuron activity recapitulated the behavioral adaptations**  
681 **observed under chronic nicotine exposure.**

682 (A) *Left*: representative current-clamp recording of a VTA DA neuron transduced with CatCh and stimulated with 5-  
683 ms blue light pulses at 8 Hz. *Right*: Average increase in basal firing frequency upon optogenetic stimulation for  $n =$   
684 10 neurons ( $p$ -value = 0.002, Wilcoxon test). (B) *Top left*: representative current-clamp recording of a VTA DA  
685 neuron transduced with Jaws and stimulated with 500-ms green light pulses at 0.5 Hz. *Bottom left*: Raster plot for  
686  $n = 16$  neurons. *Right*: Average decrease in basal firing frequency upon optogenetic stimulation, and return to the  
687 baseline after the photostimulation period, for  $n = 16$  neurons ( $p$ -value: ns = 0.18; \*\*0.004; \*\*0.0014, Wilcoxon test  
688 with Holm correction). (C) Task design and photo-stimulation protocols. DAT-iCre mice transduced with either an  
689 AAV-DIO-Catch-YFP in the VTA (CatCh, blue) or an AAV-DIO-Jaws-eGFP (Jaws, yellow) and were implanted  
690 unilaterally with bipolar stimulating electrodes for ICSS in the MFB. Following the DS and PS sessions they received  
691 2 paired ON (*filled circles*) and OFF (*open circles*) sessions with the same rules as PS. *Below*: Representative  
692 trajectories of a CatCh-transduced mouse with (*blue*) and without (*black*) optogenetic stimulation of VTA DA  
693 neurons. (D) Net effect of light stimulation for the percentage of directional changes (*left*) and the proportion of  $p_{25}$   
694 visits (*right*). Data from OFF sessions were subtracted from data from ON sessions. In red, the net effect of nicotine  
695 was represented for all the parameters, as a comparison factor. (Asterisk: Comparison with a true mean of 0 and  
696 paired comparison (On-Off), Student's t-test or Wilcoxon test, unilateral testing). (E) Net effect of photo-stimulation  
697 on the softmax model parameters  $\beta$  and  $\kappa$  (Student's t-test or Wilcoxon test, unilateral testing). (F) *Left*: Position of  
698 each animals in the ternary archetype plot. *Right*: difference in archetypal composition (ON-OFF) for each  
699 archetype. Optogenetic activation of DA neurons triggered a shift of the behavior towards the GO phenotype while  
700 optogenetic inhibition induced a shift of the behavior away from GO.

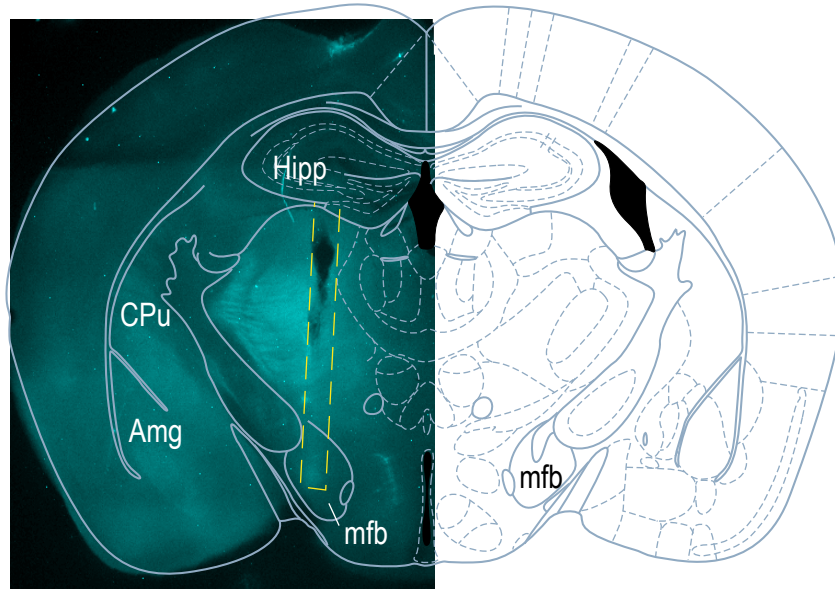

Bregma -1.34 mm  
Yellow (ICSS)

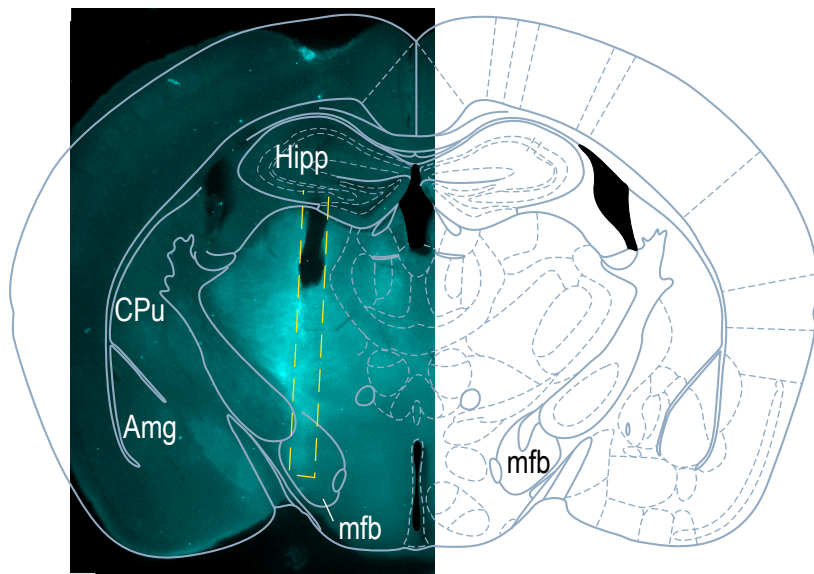

Bregma -1.34 mm  
Yellow (ICSS)

## Supplementary Figure 1

701 **Supplementary Figure 1: Stimulating electrode implantation:** Representative examples of unilateral MFB  
702 implantations in two different brains. *Post-hoc* verification of the ICSS track is represented in dotted yellow line.  
703

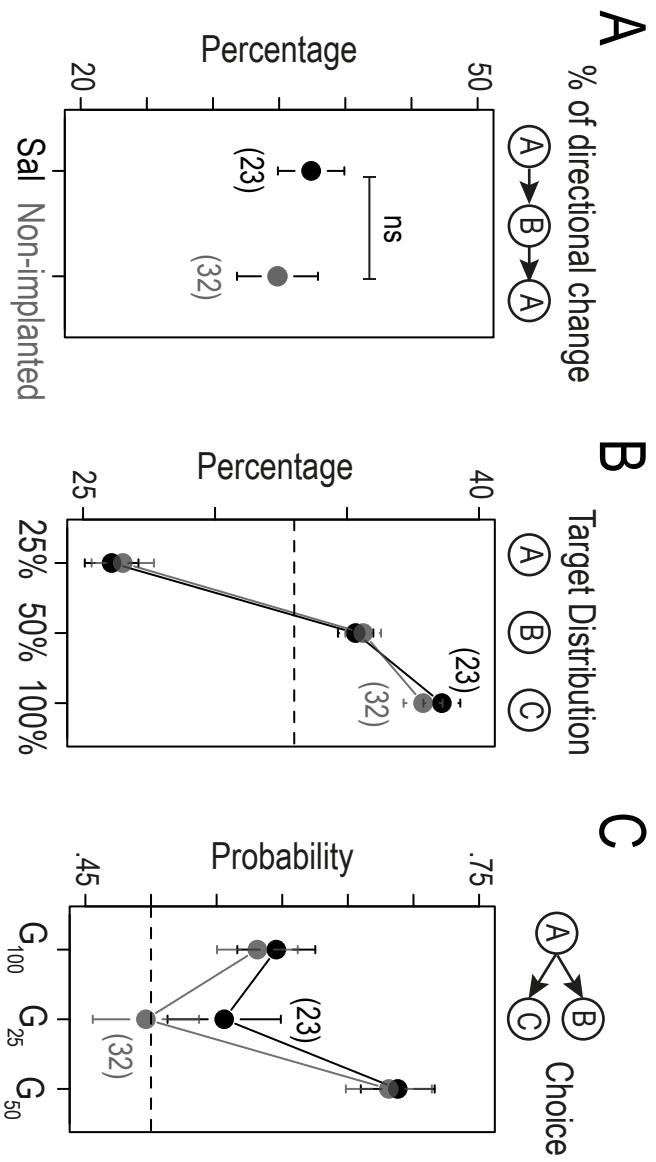

Supplementary figure 2

704 **Supplementary Figure 2: No behavioral difference between mice implanted with an osmotic minipump filled**  
705 **with saline (Sal) and non-implanted mice.** (A) Comparison of the percentage of directional change in Sal (black)  
706 and non-implanted (grey) mice (Wilcoxon signed rank test,  $p > 0.05$ ). (B) Repartition of the visits to the three targets  
707 in the DS (Wilcoxon Test  $p > 0.05$  for the three comparisons). (C) Probability to choose the alternative with the  
708 highest probability of reward for the three possible gambles:  $G_{100}$ ;  $G_{25}$  and  $G_{50}$  (Wilcoxon Test  $p > 0.05$  for the three  
709 comparisons)  
710



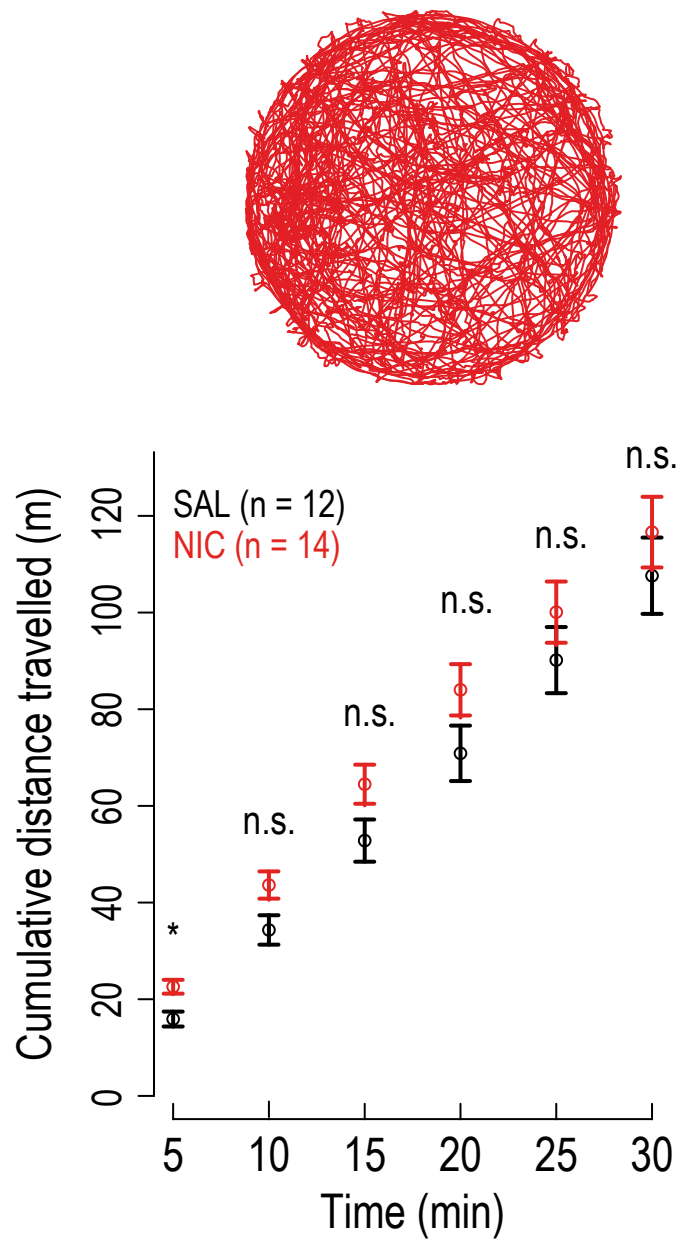

Supplementary Figure 3

711 **Supplementary Figure 3: Nicotine-treated mice show increased locomotion for the first five minutes in an**  
712 **open field.**

713 Top, trajectory in an open field (duration 30 minutes) of a mouse treated for 24 days with nicotine (10 mg/kg/day).  
714 Bottom, cumulative distance travelled in meters measured every 5 minutes during a 30 min-OF exploration. Nic  
715 mice (n = 14) showed a greater distance travelled during the first 5 minutes only (t-test,  $t = -2.4154$ ,  $df = 22.074$ ,  $p$   
716  $= 0.02444$ ), compared to saline-exposed mice (Sal, n = 12). The total distance travelled after 30 minutes was not  
717 significantly different between the two groups ( $p > 0.05$ ).  
718

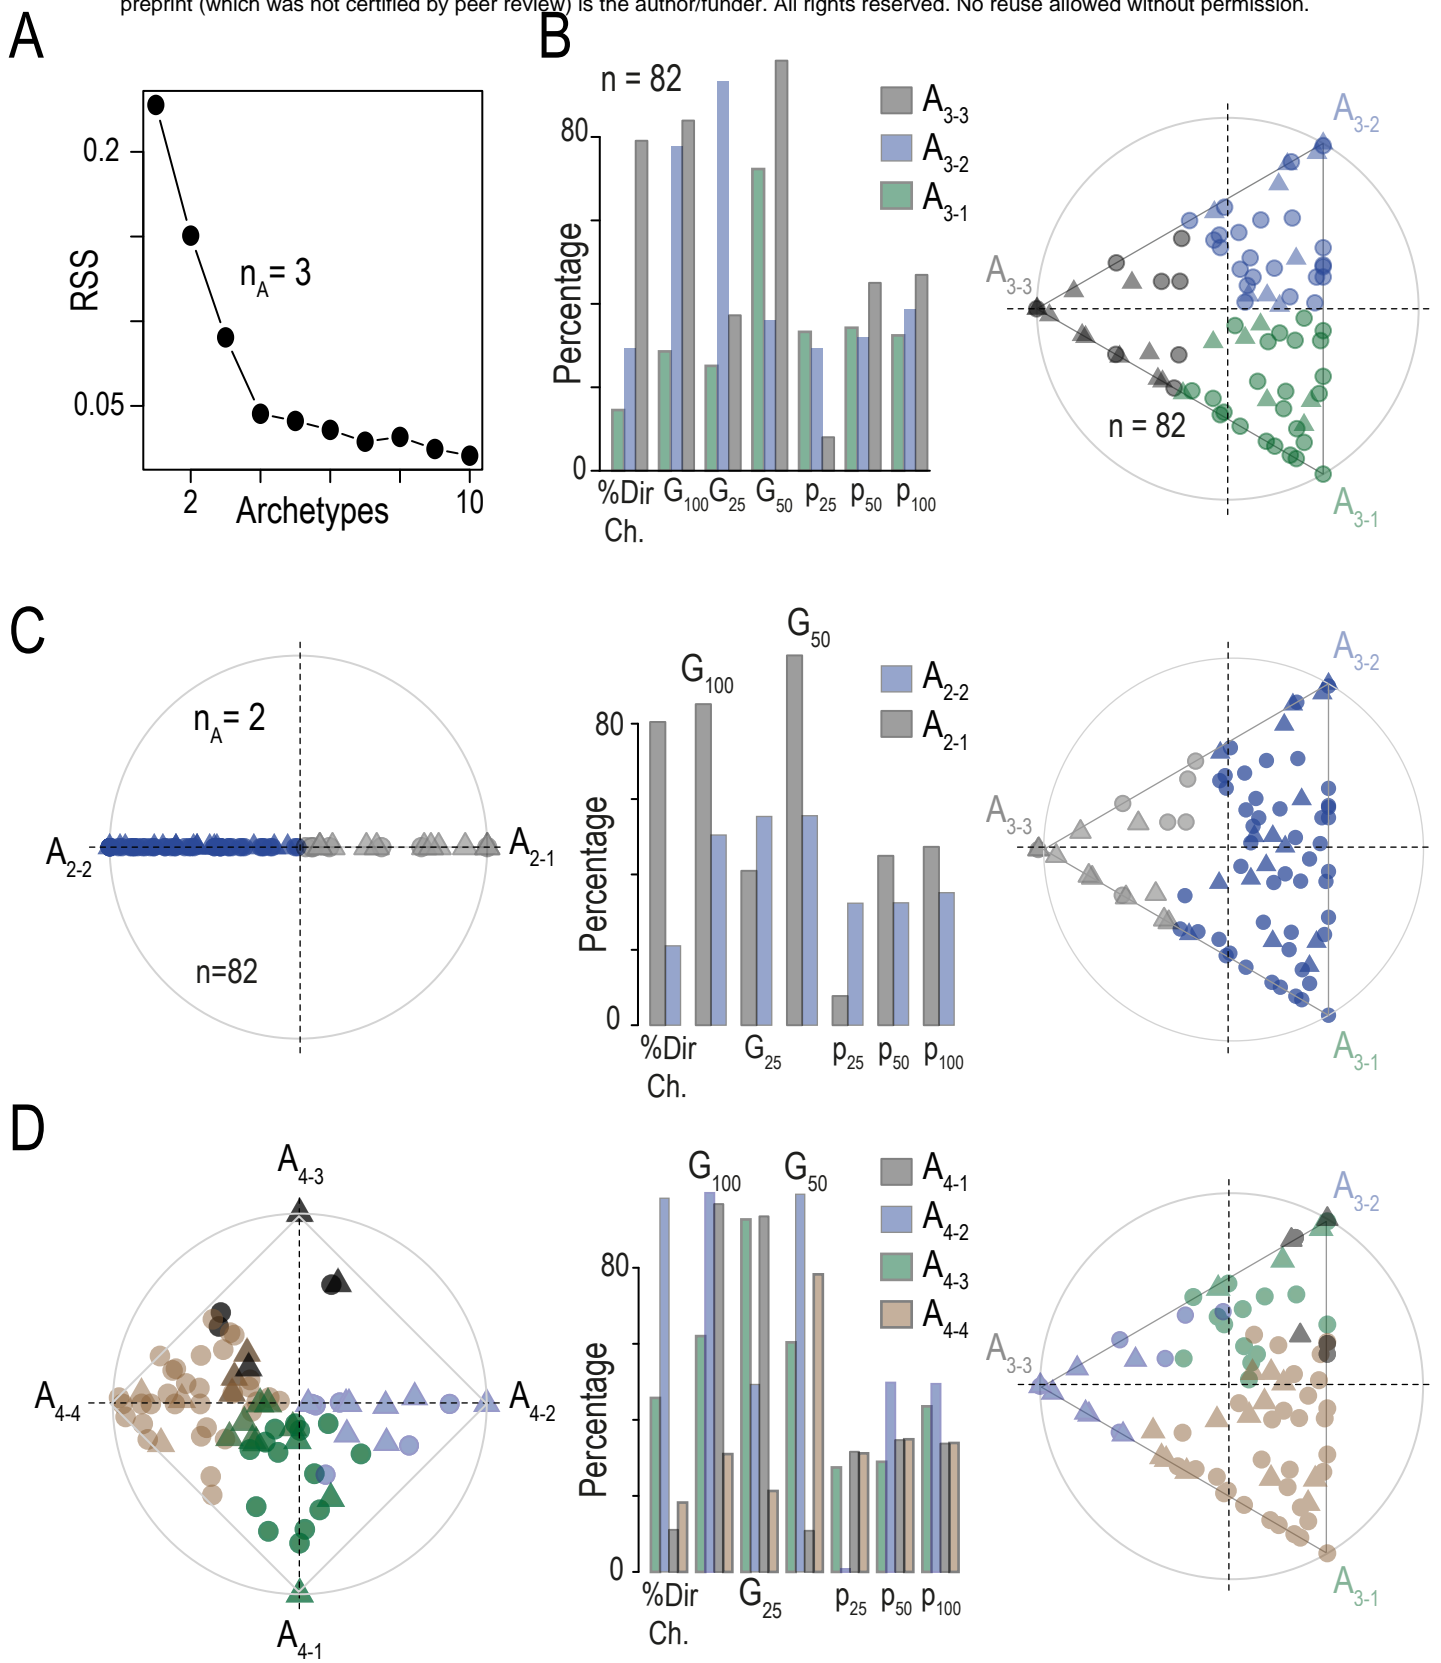

Supplementary Figure 4

719 **Supplementary Figure 4: Archetypal analyses with 2 to 4 apices:** Archetypal analysis of the choice strategies  
720 based on a 7-dimensional data space: % of directional change, Gambles  $G_{100}$  (choice 50% over 25%),  $G_{25}$  (100%  
721 over 50%) and  $G_{50}$  (100% over 25%), and probabilities of choosing each point ( $P_{25}$ ,  $P_{50}$ , and  $P_{100}$ ). Analyses were  
722 performed on  $n = 82$  mice (pooled Ctl and Nic mice). (A) Residual sum of squares for a number of archetypes  $n_A =$   
723 1 to 10. Error reduction between  $n_A = 4$  and 10 is marginal. (B) Plot of the archetypal solutions for  $n_A = 3$ . *Left:*  
724 Percentile plot of the value of the 7 basic variables used in this analysis for the three archetypes, here labelled  $A_{3-}$   
725  $_1$  to  $A_{3-3}$ .  $A_{3-1}$ ,  $A_{3-2}$  and  $A_{3-3}$  correspond to the GO, Des and Asc archetypes of Figure 3D, but are unlabeled here for  
726 comparison purposes with  $n_A = 2$  and 4. *Right:* Visualization of the  $\alpha$  coefficients using a ternary plot, in which the  
727 three apices represent the three archetypes. Each point shows the projection of each individual ( $n=82$ ). Points are  
728 color-coded according to their proximity to the archetypes. (C) Plot of the archetypal solutions  $A_{2-1}$  and  $A_{2-2}$  for  $n_A =$   
729 2. From left to right: Visualization of the  $\alpha$  coefficients in a binary plot, percentile plot and ternary plot (same as in  
730 B, with points color-coded according to their proximity to the two archetypes  $A_{2-1}$  and  $A_{2-2}$ ). (D) Same as C for  $n_A =$   
731 4 ( $A_{4-1}$  to  $A_{4-4}$ ). Note that the  $A_{3-3}$  (a.k.a. GO) archetype is present when both  $n_A = 2$  (the  $A_{2-1}$  archetype) and  $n_A = 4$   
732 ( $A_{4-2}$ ).  
733

A

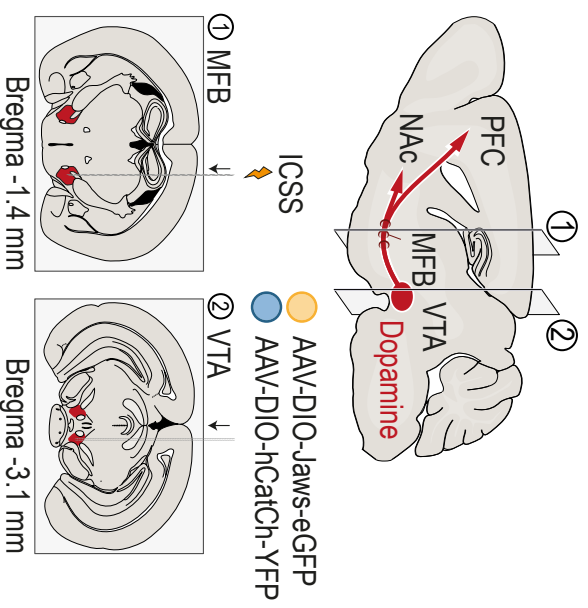

B

AAV-DIO-Jaws-eGFP

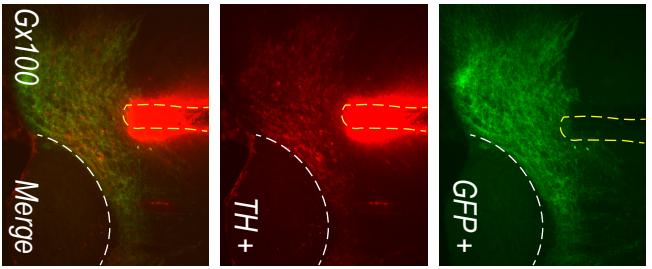

C

AAV-DIO-hCatch-YFP

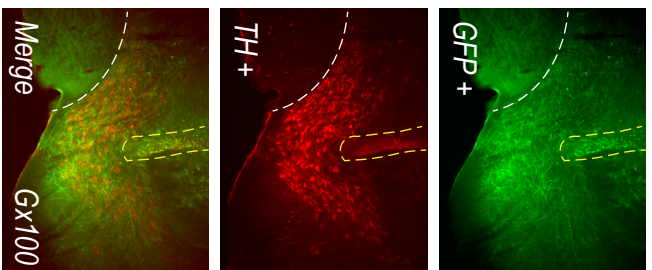

D

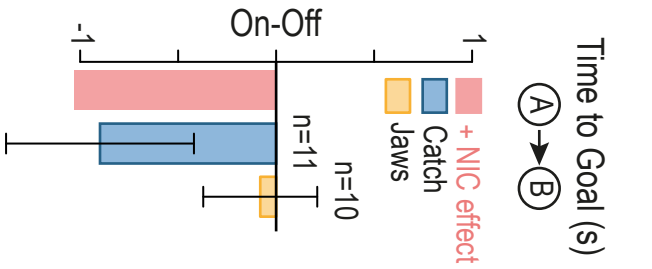

E

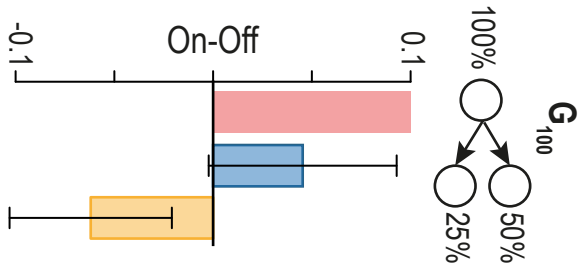

Supplementary figure 5

734 **Supplementary Figure 5: Optogenetic manipulation of choice behaviors.** (A) DAT-Cre mice were implanted  
735 unilaterally with bipolar stimulating electrodes for ICSS in the medial forebrain bundle (1) and transduced with either  
736 an AAV-DIO-Jaws-eGFP or an AAV-DIO-Catch-YFP in the VTA (2). (B) Representative immunohistochemical  
737 verification of CatCh-YFP expression selectively in DA neurons of the VTA (anti-TH in red, and -GFP in green;  
738 merge on top). *Post-hoc* verification of the unilateral fiber implantation is represented in dotted yellow lines. (C)  
739 Representative immunohistochemical verification of Jaws-eGFP expression selectively in DA neurons of the VTA  
740 (anti-TH in red, and -GFP in green; merge on top). *Post-hoc* verification of the unilateral fiber implantation is  
741 represented in dotted yellow lines. (D-E) Net effect of light stimulation on (D) the time to goal and (E) the percent  
742 of choice toward  $P_{50}$  in gamble  $G_{100}$ . Data from OFF sessions were subtracted from data from ON sessions. In red,  
743 the effect of nicotine (NIC) is represented for both parameters, as a comparison factor. (Asterisk: Comparison with  
744 a true mean of 0 and paired comparison (ON – OFF) (Student's t-test or Wilcoxon test, unilateral testing).  
745

746 **References**

747

- 748 1. Fowler, C. D., Arends, M. A. & Kenny, P. J. Subtypes of nicotinic acetylcholine receptors in nicotine  
749 reward, dependence, and withdrawal: evidence from genetically modified mice. *Behav Pharmacol* **19**,  
750 461–484 (2008).
- 751 2. Marti, F. *et al.* Smoke extracts and nicotine, but not tobacco extracts, potentiate firing and burst activity of  
752 ventral tegmental area dopaminergic neurons in mice. *Neuropsychopharmacology* **36**, 2244–2257 (2011).
- 753 3. Stolerman, I. P. & Jarvis, M. J. The scientific case that nicotine is addictive. *Psychopharmacology* **117**, 2–  
754 10– discussion 14–20 (1995).
- 755 4. Lüscher, C. & Malenka, R. C. Drug-evoked synaptic plasticity in addiction: from molecular changes to  
756 circuit remodeling. *Neuron* **69**, 650–663 (2011).
- 757 5. Association, A. P. *Diagnostic and statistical manual of mental disorders (DSM-5®)*. (2013).
- 758 6. Naudé, J., Dongelmans, M. & Faure, P. Nicotinic alteration of decision-making. *Neuropharmacology* **96**,  
759 244–254 (2015).
- 760 7. Addicott, M. A., Pearson, J. M., Sweitzer, M. M., Barack, D. L. & Platt, M. L. A Primer on Foraging and the  
761 Explore/Exploit Trade-Off for Psychiatry Research. *Neuropsychopharmacology* **42**, 1931–1939 (2017).
- 762 8. Locey, M. L. & Dallery, J. Isolating behavioral mechanisms of intertemporal choice: nicotine effects on  
763 delay discounting and amount sensitivity. *Journal of the experimental analysis of behavior* **91**, 213–223  
764 (2009).
- 765 9. Viñals, X. *et al.* Overexpression of  $\alpha 3/\alpha 5/\beta 4$  nicotinic receptor subunits modifies impulsive-like behavior.  
766 *Drug Alcohol Depend* **122**, 247–252 (2012).
- 767 10. Addicott, M. A., Pearson, J. M., Froeliger, B., Platt, M. L. & McClernon, F. J. Smoking automaticity and  
768 tolerance moderate brain activation during explore-exploit behavior. *Psychiatry Research* **224**, 254–261  
769 (2014).
- 770 11. Addicott, M. A., Pearson, J. M., Wilson, J., Platt, M. L. & McClernon, F. J. Smoking and the bandit: A  
771 preliminary study of smoker and nonsmoker differences in exploratory behavior measured with a  
772 multiarmed bandit task. *Experimental and Clinical Psychopharmacology* **21**, 66–73 (2013).
- 773 12. Levine, A. *et al.* Molecular mechanism for a gateway drug: epigenetic changes initiated by nicotine prime  
774 gene expression by cocaine. *Sci Transl Med* **3**, 107ra109 (2011).
- 775 13. Cohen, J. D., McClure, S. M. & Yu, A. J. Should I stay or should I go? How the human brain manages the  
776 trade-off between exploitation and exploration. *Philos Trans R Soc Lond, B, Biol Sci* **362**, 933–942  
777 (2007).
- 778 14. Wyart, V., Sciences, E. K. C. O. I. B. 2016. Choice variability and suboptimality in uncertain environments.  
779 *Personality and Individual Differences* **11**, 109–115 (2016).
- 780 15. Wilson, R. C., Geana, A., White, J. M., Ludvig, E. A. & Cohen, J. D. Humans use directed and random  
781 exploration to solve the explore-exploit dilemma. *J Exp Psychol Gen* **143**, 2074–2081 (2014).
- 782 16. Belkaid, M. *et al.* Mice adaptively generate choice variability in a deterministic task. *Communications*  
783 *Biology* **3**, 1–9 (2020).
- 784 17. Berlyne, D. E. Curiosity and exploration. *Science* **153**, 25–33 (1966).
- 785 18. Schultz, W. Multiple dopamine functions at different time courses. *Annu Rev Neurosci* **30**, 259–288  
786 (2007).
- 787 19. Redish, A. D., Jensen, S. & Johnson, A. A unified framework for addiction: Vulnerabilities in the decision  
788 process. *The Behavioral and brain sciences* **31**, 415–37; discussion 437–87 (2008).
- 789 20. Lüscher, C., Robbins, T. W. & Everitt, B. J. The transition to compulsion in addiction. *Nat Rev Neurosci*  
790 **21**, 1–17 (2020).
- 791 21. Kalivas, P. W. & Volkow, N. D. The neural basis of addiction: a pathology of motivation and choice. **162**,  
792 1403–1413 (2005).
- 793 22. Mizumori, S. J. Y. & Jo, Y. S. Homeostatic regulation of memory systems and adaptive decisions.  
794 *Hippocampus* **23**, 1103–1124 (2013).
- 795 23. Cagniard, B. *et al.* Dopamine scales performance in the absence of new learning. *Neuron* **51**, 541–547  
796 (2006).
- 797 24. Westbrook, A. & Braver, T. S. Dopamine Does Double Duty in Motivating Cognitive Effort. *Neuron* **89**,  
798 695–710 (2016).

- 799 25. Niv, Y., Daw, N. D., Joel, D. & Dayan, P. Tonic dopamine: opportunity costs and the control of response  
800 vigor. *Psychopharmacology* **191**, 507–520 (2007).
- 801 26. Frank, M. J., Doll, B. B., Oas-Terpstra, J. & Moreno, F. Prefrontal and striatal dopaminergic genes predict  
802 individual differences in exploration and exploitation. *Nat Neurosci* **12**, 1062–1068 (2009).
- 803 27. Humphries, M. D., Khamassi, M. & Gurney, K. Dopaminergic Control of the Exploration-Exploitation  
804 Trade-Off via the Basal Ganglia. *Frontiers in neuroscience* **6**, 9 (2012).
- 805 28. Beeler, J. A., Daw, N., Frazier, C. R. M. & Zhuang, X. Tonic dopamine modulates exploitation of reward  
806 learning. *Front. Behav. Neurosci.* **4**, 170 (2010).
- 807 29. Cinotti, F. *et al.* Dopamine blockade impairs the exploration-exploitation trade-off in rats. *Sci. Rep.* **9**,  
808 6770 (2019).
- 809 30. Naudé, J. *et al.* Nicotinic receptors in the ventral tegmental area promote uncertainty-seeking. *Nat*  
810 *Neurosci* **19**, 471–478 (2016).
- 811 31. Faure, P., Tolu, S., Valverde, S. & Naudé, J. Role of nicotinic acetylcholine receptors in regulating  
812 dopamine neuron activity. *Neuroscience* **282C**, 86–100 (2014).
- 813 32. Epping-Jordan, M. P., Watkins, S. S., Koob, G. F. & Markou, A. Dramatic decreases in brain reward  
814 function during nicotine withdrawal. *Nature* **393**, 76–79 (1998).
- 815 33. Morel, C. *et al.* Nicotinic receptors mediate stress-nicotine detrimental interplay via dopamine cells'  
816 activity. *Mol Psychiatry* **23**, 1597–1605 (2017).
- 817 34. Tolu, S. *et al.* Nicotine enhances alcohol intake and dopaminergic responses through  $\beta 2^*$  and  $\beta 4^*$   
818 nicotinic acetylcholine receptors. *Sci. Rep.* **7**, 45116 (2017).
- 819 35. CUTLER, A. & BREIMAN, L. Archetypal Analysis. *Technometrics* **36**, 338–347 (1994).
- 820 36. Hart, Y. *et al.* Inferring biological tasks using Pareto analysis of high-dimensional data. *Nat Meth* **12**, 233–  
821 5– 3 p following 235 (2015).
- 822 37. Belkaid, M. *et al.* Mice adaptively generate choice variability in a deterministic task - behavioral data.  
823 (2019). doi:10.5281/zenodo.3576423
- 824 38. Besson, M. *et al.* Long-term effects of chronic nicotine exposure on brain nicotinic receptors. *Proc Natl*  
825 *Acad Sci USA* **104**, 8155–8160 (2007).
- 826 39. Kleinlogel, S. *et al.* Ultra light-sensitive and fast neuronal activation with the  $Ca^{2+}$ -permeable  
827 channelrhodopsin CatCh. **14**, 513–518 (2011).
- 828 40. Chuong, A. S. *et al.* *Noninvasive optical inhibition with a red-shifted microbial rhodopsin.* **17**, 1123–1129  
829 (Nature Publishing Group, 2014).
- 830 41. Heilbronner, S. R. & Hayden, B. Y. Contextual factors explain risk-seeking preferences in rhesus  
831 monkeys. *Frontiers in neuroscience* **7**, 7 (2013).
- 832 42. Hernandez, G., Trujillo-Pisanty, I., Cossette, M.-P., Conover, K. & Shizgal, P. Role of dopamine tone in  
833 the pursuit of brain stimulation reward. *Journal of Neuroscience* **32**, 11032–11041 (2012).
- 834 43. Kenny, P. J. & Markou, A. Nicotine self-administration acutely activates brain reward systems and  
835 induces a long-lasting increase in reward sensitivity. *Neuropsychopharmacology* **31**, 1203–1211 (2006).
- 836 44. Juarez, B. *et al.* Midbrain circuit regulation of individual alcohol drinking behaviors in mice. *Nature*  
837 *Communications* **8**, 2220 (2017).
- 838 45. Stern, S., Kirst, C. & Bargmann, C. I. Neuromodulatory Control of Long-Term Behavioral Patterns and  
839 Individuality across Development. *Cell* **171**, 1–25 (2017).
- 840 46. MacDonald, S. W. S., Nyberg, L. & Bäckman, L. Intra-individual variability in behavior: links to brain  
841 structure, neurotransmission and neuronal activity. *TINS* **29**, 474–480 (2006).
- 842 47. Torquet, N. *et al.* Social interactions impact on the dopaminergic system and drive individuality. *Nature*  
843 *Communications* **9**, 3081 (2018).
- 844 48. Smillie, L. D. & Wacker, J. Dopaminergic foundations of personality and individual differences. *Front.*  
845 *Hum. Neurosci.* **8**, 874 (2014).
- 846 49. DeYoung, C. G. Personality Neuroscience and the Biology of Traits. *Social and Personality Psychology*  
847 *Compass* **4**, 1165–1180 (2010).
- 848 50. Palmatier, M. I. *et al.* Dissociating the primary reinforcing and reinforcement-enhancing effects of nicotine  
849 using a rat self-administration paradigm with concurrently available drug and environmental reinforcers.  
850 *Psychopharmacology* **184**, 391–400 (2006).
- 851 51. Chiu, P. H., Lohrenz, T. M. & Montague, P. R. Smokers' brains compute, but ignore, a fictive error signal  
852 in a sequential investment task. *Nat Neurosci* **11**, 514–520 (2008).



- 853 52. Addicott, M. A., Pearson, J. M., Kaiser, N., Platt, M. L. & McClernon, F. J. Suboptimal foraging behavior:  
854 a new perspective on gambling. *Behav. Neurosci.* **129**, 656–665 (2015).
- 855 53. McGrath, D. S. & Barrett, S. P. The comorbidity of tobacco smoking and gambling: a review of the  
856 literature. *Drug Alcohol Rev* **28**, 676–681 (2009).
- 857 54. Exley, R. *et al.* Distinct contributions of nicotinic acetylcholine receptor subunit alpha4 and subunit alpha6  
858 to the reinforcing effects of nicotine. *Proc Natl Acad Sci USA* **108**, 7577–7582 (2011).
- 859 55. Ungless, M. A. & Grace, A. A. Are you or aren't you? Challenges associated with physiologically  
860 identifying dopamine neurons. *TINS* **35**, 422–430 (2012).
- 861 56. Daw, N. D. in *Decision Making, Affect, and Learning* 3–38 (Oxford University Press).  
862 doi:10.1093/acprof:oso/9780199600434.003.0001
- 863 57. Eugster, M. J. A. & Leisch, F. From Spider-Man to Hero - Archetypal Analysis in R. *Journal of Statistical*  
864 *Software* **30**, 1–23 (2009).  
865
